1 Evolutionary rate covariation analysis of E-cadherin identifies Raskol as regulator of cell  
2 adhesion and actin dynamics in *Drosophila*

3 Short title: Raskol regulates border cell migration in the *Drosophila* egg chamber

4 Qanber Raza<sup>1</sup>, Jae Young Choi<sup>2</sup>, Yang Li<sup>1</sup>, Roisin M. O'Dowd<sup>1</sup>, Simon C. Watkins<sup>1,3</sup>,  
5 Yang Hong<sup>1</sup>, Nathan L. Clark<sup>4</sup>, Adam V. Kwiatkowski<sup>1\*</sup>

6 <sup>1</sup> Department of Cell Biology, University of Pittsburgh School of Medicine, Pittsburgh,  
7 PA, USA

8 <sup>2</sup> Center for Genomics and Systems Biology, Department of Biology, New York  
9 University, New York, NY USA

10 <sup>3</sup> Center for Biologic Imaging, University of Pittsburgh School of Medicine, Pittsburgh,  
11 PA, USA

12 <sup>4</sup> Department of Computational and Systems Biology, University of Pittsburgh,  
13 Pittsburgh, PA, USA

14 \* Corresponding author

15 E-mail: adamkwi@pitt.edu (AVK)

16

## 17 **Abstract**

18           The adherens junction couples the actin cytoskeletons of neighboring cells to  
19 provide the foundation for multicellular organization. The core of the adherens junction  
20 is the cadherin-catenin complex that arose early in the evolution of multicellularity to link  
21 cortical actin to intercellular adhesions. Over time, evolutionary pressures have shaped  
22 the signaling and mechanical functions of the adherens junction to meet specific  
23 developmental and physiological demands. Evolutionary rate covariation (ERC)  
24 identifies genes with correlated fluctuations in evolutionary rate that can reflect shared  
25 selective pressures and functions. Here we use ERC to identify genes with evolutionary  
26 histories similar to *shotgun* (*shg*), which encodes the *Drosophila* E-cadherin (DE-Cad)  
27 ortholog. Core adherens junction components  $\alpha$ -catenin and p120-catenin displayed  
28 strong ERC correlations with *shg*, indicating that they evolved under similar selective  
29 pressures during evolution between *Drosophila* species. Further analysis of the *shg*  
30 ERC profile revealed a collection of genes not previously associated with *shg* function  
31 or cadherin-mediated adhesion. We then analyzed the function of a subset of ERC-  
32 identified candidate genes by RNAi during border cell (BC) migration and identified  
33 novel genes that function to regulate DE-Cad. Among these, we found that the gene  
34 *CG42684*, which encodes a putative GTPase activating protein (GAP), regulates BC  
35 migration and adhesion. We named *CG42684* *raskol* (“to split” in Russian) and show  
36 that it regulates DE-Cad levels and actin protrusions in BCs. We propose that Raskol  
37 functions with DE-Cad to restrict Ras/Rho signaling and help guide BC migration. Our  
38 results demonstrate that a coordinated selective pressure has shaped the adherens  
39 junction and this can be leveraged to identify novel components of the complexes and  
40 signaling pathways that regulate cadherin-mediated adhesion.

## 41 **Author Summary**

42           The establishment of intercellular adhesions facilitated the genesis of  
43 multicellular organisms. The adherens junction, which links the actin cytoskeletons of  
44 neighboring cells, arose early in the evolution of multicellularity and selective pressures  
45 have shaped its function and molecular composition over time. In this study, we used  
46 evolutionary rate covariation (ERC) analysis to examine the evolutionary history of the  
47 adherens junction and to identify genes that coevolved with the adherens junction gene  
48 *shotgun*, which encodes the *Drosophila* E-cadherin (DE-Cad). ERC analysis of *shotgun*  
49 revealed a collection of genes with similar evolutionary histories. We then tested the  
50 role of these genes in border cell migration in the fly egg chamber, a process that  
51 requires the coordinated regulation of cell-cell adhesion and cell motility. Among these,  
52 we found that a previously uncharacterized gene *CG42684*, which encodes a putative  
53 GTPase activating protein (GAP), regulates the collective cell migration of border cells,  
54 stabilizes cell-cell adhesions and regulates the actin dynamics. Our results demonstrate  
55 that components of the adherens junction share an evolutionary history and that ERC  
56 analysis is a powerful method to identify novel components of cell adhesion complexes  
57 in *Drosophila*.

58

## 59 **Introduction**

60           The adherens junction (AJ) is a multiprotein complex that is essential for  
61 intercellular adhesion in metazoa. The core of the AJ is the cadherin-catenin complex.  
62 Classical cadherins are single-pass transmembrane proteins with an extracellular  
63 domain that mediates calcium-dependent homotypic interactions. The adhesive  
64 properties of classical cadherins are driven by the recruitment of cytosolic catenin  
65 proteins to the cadherin tail: p120-catenin binds to the juxta-membrane domain and  $\beta$ -  
66 catenin binds to the distal part of the tail.  $\beta$ -Catenin recruits  $\alpha$ -catenin to the cadherin-  
67 catenin complex.  $\alpha$ -Catenin is an actin-binding protein and the primary link between the  
68 AJ and the actin cytoskeleton [1-3].

69           The primary function of the AJ is to link actin to intercellular junctions. It is  
70 believed the AJ arose early in the evolution of multicellular metazoans to coordinate  
71 epithelial tissue formation and organization [4-7]. The AJ has since evolved to function  
72 in a range of physiological and developmental processes, including cell polarity,  
73 collective cell migration and cell division [8, 9]. AJ function in these diverse processes  
74 requires an array of ancillary regulatory proteins, including kinases, signaling molecules  
75 and adaptor proteins [10-14]. Defining the molecular networks that regulate AJ biology  
76 is critical to understanding cadherin-mediated adhesion in normal and disease states.

77           Evolutionary rate covariation (ERC) analysis is a comparative genomic approach  
78 that has been used successfully to identify genes with shared functions in canonical  
79 protein complexes and biological processes in prokaryotes, fungi, *Drosophila* and  
80 mammals [15-21]. ERC analysis takes advantage of the evolutionary rates shared  
81 between co-functional genes that have correlated rates of change due to common

82 selective pressures. ERC represents the correlation coefficient of branch-specific  
83 evolutionary rates that are estimated from the phylogenetic trees of a pair of genes and  
84 their orthologs from multiple species[19]. ERC analysis permits the identification of  
85 genes within a given genome that evolved in a correlated manner and hence might  
86 function in the same pathway or molecular complex. These genes can then be screened  
87 by RNAi-based knockdown or similar genetic approaches to validate their role in a  
88 relevant biological process.

89         Border cell (BC) migration in the developing *Drosophila* egg chamber requires  
90 coordinated cell adhesion and migration. During BC migration, a group of 6-8 follicular  
91 cells delaminate from the anterior most tip of the epithelium and undergo haptotaxis and  
92 migrate collectively towards the developing oocyte [22, 23]. The BC cluster consists of  
93 migratory BCs and a centrally positioned pair of polar cells (PCs) that signal to BCs and  
94 contribute to cluster adherence [23]. BC migration is highly dependent on *Drosophila* E-  
95 Cadherin (DE-Cad, encoded by *shotgun* (*shg*)) [24-26]. Upregulation of DE-Cad is  
96 essential for the initial delamination and subsequent migration of BC since disruption of  
97 DE-Cad-mediated adhesion affects the ability of BC to detach from the follicular  
98 epithelium (FE) and collectively migrate [24, 25].

99         We performed ERC analysis of *shg* to identify genes that share a common  
100 evolutionary history, and therefore may share an overlapping function, with *shg* and  
101 assessed their role in BC migration. Genes encoding the primary components of AJ,  
102 including  $\alpha$ -Cat and *p120-catenin*, display high ERC values relative to *shg* and one  
103 another, suggesting that these genes and their protein products are co-functional, which  
104 is well described in the literature [1, 27]. We show that genes showing high ERC values

105 with *shg* are enriched for membrane-associated proteins and proteins that function in E-  
106 cadherin-dependent biological processes. We then conducted an RNAi-mediated  
107 genetic screen in BCs with 34 high-ranking ERC candidates and identified both novel  
108 and known genes that function to regulate DE-Cad at cell contacts. Among those, we  
109 characterized a GTPase activating protein (GAP) domain encoding gene, *CG42684*,  
110 which we have named “*raskol*” after the Russian term “to split”. We show that Raskol  
111 colocalizes with DE-Cad, regulates DE-Cad levels at the BC-BC interface and  
112 modulates actin-rich protrusions during BC migration. Our results demonstrate that  
113 components of the AJ share an evolutionary history and that ERC analysis is a powerful  
114 method to identify novel components of cell adhesion complexes in *Drosophila*.

## 115 **Results**

### 116 **ERC analysis identifies genes that coevolved with *shg***

117 We used ERC analysis to identify novel genes that regulate DE-Cad-mediated  
118 adhesion in *Drosophila*. Since ERC signatures are often observed between proteins that  
119 function in a molecular complex [15, 16, 18, 19], we evaluated the ERC values of the fly  
120 AJ components – *shotgun* (*shg*, DE-Cad), *armadillo* (*arm*;  $\beta$ -catenin in vertebrates),  $\alpha$ -  
121 *catenin* ( $\alpha$ -*Cat*), *p120-catenin* (*p120ctn*), *Vinculin* (*Vinc*) and *canoe* (*cno*, afadin in  
122 vertebrates). Notably, *shg*,  $\alpha$ -*Cat* and *p120ctn* displayed positive ERC values with each  
123 other (Fig 1A). *arm*, *Vinc* and *cno* did not show elevated ERC values relative to *shg*,  $\alpha$ -  
124 *Cat* or *p120ctn*. Since Arm, Vinc and Cno are known to function independently of  
125 cadherin-mediated adhesion [28-31], we speculate that alternative selective pressures  
126 have influenced the evolution of these genes in flies, likely obscuring any ERC signature  
127 with purely AJ genes. Nonetheless, ERC analysis suggested that the AJ components

| Genes      | ERC value | Function in flies                              | Ortholog(s) (score*) | Ortholog function in mammals                   |
|------------|-----------|------------------------------------------------|----------------------|------------------------------------------------|
| <i>grk</i> | 0.62      | Growth factor (EGF)                            | Nrg (1/15)           | EGF family receptor ligand                     |
| <i>cac</i> | 0.62      | Voltage-gated Ca <sup>2+</sup> channel subunit | Cacna1 (11/15)       | Voltage-gated Ca <sup>2+</sup> channel subunit |

128 DE-Cad,  $\alpha$ -Cat and p120ctn coevolved to maintain their collective function in cell-cell  
129 adhesion. We postulated that other genes whose products regulate AJ biology would  
130 have similar evolutionary histories to maintain functionality.

131 We then used ERC analysis to identify genes with high ERC values relative to  
132 the core of the AJ complex, *shg* (S1 Table). We identified 137 genes with ERC values of  
133 0.4 or greater, representing the top 1.3% of *shg* ERC values. Since  $\alpha$ -Cat has an ERC  
134 value of 0.47 relative to *shg* (Fig 1A), placing their ERC value in the top 0.6 % of all  
135 gene pairs, we reasoned that genes with similar or higher ERC values would represent  
136 genes with similar evolutionary histories to *shg*. Accordingly, the thresholded *shg* ERC  
137 list contains genes with described roles in AJ regulation such as *Hrb98DE* [32, 33],  
138 *PDZ-GEF* [34, 35], *babo* [36, 37], *CG16952* [38, 39] and *Rab5* [40-42] (Table 1).  
139 Excitingly, the majority of identified genes have not been associated with the AJ and  
140 include transcription factors, kinases, GTPase regulatory proteins and calcium channel  
141 regulators (Table 1). A previous genomic RNAi screen conducted in *Drosophila* S2 cells  
142 [43] and E-Cadherin proximity biotinylation screens in epithelial cells [44, 45] identified  
143 multiple hubs of interactors and regulators. Cross referencing the *shg* ERC list with the  
144 hits from these screens revealed only a few common genes such as *RhoGAPp190*,  
145 *Rab5*, *Appl* and *Stim*. This suggests that ERC analysis is identifying additional *shg*  
146 regulatory components that were undetected in genetic or proteomic screens.

147

|                                 |      |                                         |                                                           |                                            |
|---------------------------------|------|-----------------------------------------|-----------------------------------------------------------|--------------------------------------------|
| <i>Hrb98DE</i>                  | 0.54 | mRNA binding                            | Hnrnpa2b1<br>(13/15)                                      | RNA binding protein                        |
| <i>PDZ-GEF</i>                  | 0.53 | Rap1 GEF                                | Rapgef2<br>(13/15)<br>Rapgef6<br>(12/15)                  | Rap GEF                                    |
| <i>Rab5</i>                     | 0.52 | Rab GTPase;<br>protein trafficking      | Rab5c (13/15)<br>Rab5b (14/15)                            | Rab GTPase; protein<br>trafficking         |
| <i>Stim</i>                     | 0.52 | Ca <sup>2+</sup> channel<br>regulator   | Stim1<br>(13/15)                                          | Ca <sup>2+</sup> influx regulation         |
| <i>raskol</i><br><i>CG42684</i> | 0.50 | GTPase activator<br>activity (inferred) | Dab2ip<br>(8/15)<br>Rasal2<br>(8/15)<br>Syngap1<br>(7/15) | Ras-GAP<br>Ras-GAP<br>Synaptic Ras-GAP     |
| <i>babo</i>                     | 0.5  | Activin (TGFβ)<br>receptor              | Tgfr1 (14/15)<br>Acvr1<br>(11/15)                         | TGF-β receptor                             |
| <i>Gug</i>                      | 0.49 | Nuclear repressor                       | Rere<br>(10/15)                                           | Transcriptional repressor                  |
| <i>Pdk1</i>                     | 0.46 | Kinase; cell<br>signaling               | Pdpk1 (11/15)                                             | Kinase; cell signaling                     |
| <i>CG16952</i>                  | 0.46 | -                                       | Btbd7<br>(10/15)                                          | Branching morphogenesis                    |
| <i>CG11593</i>                  | 0.46 | -                                       | Bnip2<br>(6/15)                                           | Rho GTPase signaling                       |
| <i>CG14883</i>                  | 0.44 | -                                       | Gde1<br>(12/15)                                           | Glycerophosphodiester<br>phosphodiesterase |

148 Using gene ontology (GO) based enrichment analysis, we found that the *shg*

149 ERC genes are enriched for plasma membrane (PM) localized proteins and PM-

150 associated protein complexes (Fig 1B). Additionally, genes that function in biological

**Table 1. Function of selected conserved genes identified in *shg* ERC analysis.**

\*Score from flybase ([www.flybase.org](http://www.flybase.org)) orthologue database. Ratio indicates sequence alignment algorithms that reported significant homology with mammalian orthologues.

151 processes requiring E-cadherin-mediated adhesion, such as wing disc morphogenesis,

152 imaginal disc morphogenesis, epithelial morphogenesis, cell migration and AJ

153 organization, were significantly overrepresented in the *shg* ERC list (Fig 1C). Next, we



154 analyzed the molecular functions of the human orthologs of the ERC identified genes.  
155 We found that genes involved in epithelial AJ remodeling and cancer molecular  
156 mechanism were overrepresented (Fig 1D; S2 and S3 Table). Also, genes that function  
157 in RhoA, CCR5, TGF- $\beta$ , PTEN and AJ-mediated signalling pathways were enriched (Fig  
158 1D, S2 and S3 Table). Thus, the *shg* ERC list contains genes with established roles in  
159 regulating AJs as well as novel candidate genes.

### 160 **RNAi screen in BCs identifies genes that regulate cell-cell adhesion**

161 To evaluate the function of genes in the *shg* ERC list, we conducted an *in vivo*  
162 RNAi-based genetic screen in the *Drosophila* egg chamber. We analyzed BC collective  
163 cell migration (CCM) because it is regulated by DE-Cad and is a powerful system to  
164 study the interplay between cell migration and cell-cell adhesion (Fig 2A) [23, 24]. BC  
165 detachment from the FE and concomitant CCM requires increased DE-Cad expression  
166 and loss of DE-Cad arrests BC migration [24, 25].

167 First, we downregulated levels of individual AJ genes by using the GAL4/UAS  
168 system to drive UAS-RNAi transgenes in the migrating BC cluster. We used a BC  
169 specific driver, *slowborder*-GAL4 (*slbo*-GAL4) [46, 47] to drive expression of a UAS-  
170 GFP reporter and a UAS-RNAi transgene targeted against the gene of interest. Stage  
171 10 egg chambers expressing RNAi and GFP in BCs were fixed and scored for BC  
172 cluster position along the anterior-posterior migration axis (Fig 2H). In control egg  
173 chambers, nearly all BC clusters completed migration and were positioned adjacent to  
174 the oocyte (Fig 2B and 2I). In contrast, downregulation of *shg* caused a BC migration  
175 failure or delay in all egg chambers (Fig 2C and 2I). BC migratory defects were less  
176 severe in egg chambers with reduced expression of  $\alpha$ -Cat compared to *shg*; however,

177 the prevalence of defects was higher than in control egg chambers (Fig 2I). We could  
178 not assess the effect of *arm* downregulation since *arm* RNAi expressing flies did not  
179 survive to adulthood. The downregulation of *CadN*, *Vinc*, *p120ctn* or *cno* did not lead to  
180 BC migratory defects (Fig 2I).

181 Next, we screened 34 genes from the *shg* ERC list. We focused on genes that  
182 are expressed in the ovary [48] and for which an RNAi stock was readily available (S4  
183 Table). The downregulation of target genes displayed a variable range of BC migration  
184 defects with 12 genes displaying defects in more than 15% of egg chambers assessed  
185 compared to 4% in control (Fig 2J). We also randomly selected and screened six genes  
186 that had either very low ERC values or did not appear in the *shg* ERC list for migration  
187 defects. As expected, we did not observe strong migration defects when these genes  
188 were knocked down (Fig 2K). Moreover, the *shg* ERC genes showed statistically lower  
189 average migration than the random negative control genes (Wilcoxon rank sum test,  
190  $p=0.0162$ ), supporting the hypothesis that genes with correlated evolutionary histories  
191 share functional characteristics. *Pdk1* knockdown resulted in the most penetrant  
192 phenotype with 50% of egg chambers displaying either a failure or delay in BC  
193 migration (Fig 2D and 2J). Knockdown of *babo* and *CG42684* caused migration delays  
194 similar to  $\alpha$ -*Cat* (Fig 2E–J). Additionally, knockdown of multiple genes resulted in  
195 considerable migration delays relative to the control including *CG16952* (Fig 2D),  
196 *Hrb98DE*, *magu*, *InR*, *RhoGAPP190*, *PDZ-GEF* and *CG11593* (Fig 2J). Conversely,  
197 knockdown of genes such as *enc*, *mppe* and *rfx* did not affect BC migration (Fig 2J).

198 While screening  $\alpha$ -*Cat* knockdown egg chambers, we noticed that about 20% of  
199 the egg chambers displayed a cluster disassociation phenotype where one or more BCs

200 had separated from the cluster (Fig 3B and 3G). Since this phenotype is indicative of  
201 cell adhesion defects in BCs [24], we scored cluster disassociation for all genotypes. In  
202 control BCs expressing luciferase RNAi, disassociated clusters were rarely observed  
203 (Fig 3A and 3G). Likewise, downregulation of genes with low ERC values did not show  
204 a cluster disassociation phenotype (Fig 3I). Knockdown of *CadN*, *vinc*, *p120ctn* and *cno*  
205 also did not cause a penetrant cluster disassociation phenotype (Fig 3G). However,  
206 cluster disassociation phenotypes were observed with a number of ERC target genes.  
207 *CG42684*, *PDZ-GEF*, *CG16952*, *CG11593*, *zormin*, *cac* and *Rab5* displayed similar or  
208 higher cluster disassociation phenotypes compared to  $\alpha$ -*Cat* (Fig 3). Overall, these ERC  
209 target genes, chosen for their high *shg* ERC values, exhibited the cluster disassociation  
210 phenotype significantly more often than genes with low *shg* ERC values (Wilcoxon rank  
211 sum test,  $p = 0.00022$ ). Together, these results demonstrate that highly ranked genes in  
212 the *shg* ERC list contain factors that may regulate cell adhesion during BC collective cell  
213 migration.

#### 214 **Top ERC candidates regulate DE-Cad levels in BCs**

215 Since knockdown of a subset of *shg* ERC list genes disrupted BC migration, we  
216 hypothesized that these genes might regulate DE-Cad at BC contacts. To test this, we  
217 quantified DE-Cad levels along cell-cell contacts between BCs in RNAi-expressing  
218 clusters. We used a DE-Cad-GFP knock-in stock that express DE-Cad at endogenous  
219 levels [49] and drove RNAi constructs under the control of *slbo*-GAL4. In control egg  
220 chambers where either luciferase RNAi or RFP were expressed, high DE-Cad levels  
221 were observed at BC-BC contacts (Fig 4A, S2A Fig). As expected, *shg* RNAi expression  
222 severely reduced DE-Cad levels in the BC cluster (Fig 4B). Knockdown of *CG42684*

223 (Fig 4C), *CG16952* (Fig 4D), *CG11593* (Fig 4E), *babo* (Fig 4G) and *Hrb98DE* (S2B Fig)  
224 caused a significant reduction in DE-Cad levels at BC-BC contacts. Interestingly,  
225 knockdown of *Pdk1*, a kinase in the PI3K pathway [50], did not affect DE-Cad levels in  
226 BCs even though it displayed the most prominent migration defect (Fig 4F). As  
227 expected, expression of RNAi for genes *capt* and *CG5872*, which have very low ERC  
228 values relative to *shg* and were therefore not predicted to operate in this pathway, did  
229 not cause a reduction in DE-Cad levels at BC-BC contacts (S2C and S2D Fig).  
230 Collectively, these results indicate that a significant subset of genes with high ERC  
231 values relative to *shg*, many of which were previously not associated with cadherin  
232 function, regulate DE-Cad levels at BC-BC contacts.

### 233 **Raskol colocalizes with DE-Cadherin**

234 Knockdown of *CG42684* displayed the most severe cell disassociation  
235 phenotype amongst all genes tested (Fig 3). *CG42684* is reported to localize at the cell  
236 cortex and is enriched specifically at the apical surface of epithelial cells in *Drosophila*  
237 embryo [51] though almost nothing is known about its molecular function in flies. The  
238 mammalian orthologs of *CG42684*, *Rasal2* and *Dab2IP*, also localize to the PM [52].  
239 Interestingly, and similar to the impact we report here for *CG42684*, downregulation of  
240 *Rasal2* disrupts E-Cadherin localization at the cell contacts [53], though the mechanism  
241 for this disruption remains poorly defined and its conservation across phyla has yet to  
242 be reported. Therefore, we wanted to determine whether *CG42684*, which we named  
243 “Raskol” (Russian for “to split”) associates with DE-Cad along the cell membrane.  
244 Consistent with earlier localization studies, a YFP-trap stock expressing Raskol-YFP  
245 localized to the cell periphery in embryonic epidermal cells (S3 Fig) [51]. We used this

246 stock to assess Raskol colocalization with DE-Cad along the BC membrane. In  
247 *Drosophila* stage 8 embryos, before BCs have delaminated, Raskol localized to the cell  
248 membrane of BCs and PCs and was enriched at the PC apical membrane (Fig 5A, S2B  
249 Fig). During migratory stages, Raskol localization persisted at the PC apical membrane  
250 and at the cell-cell contacts of BCs and PCs (Fig 5B). Immunolabeling of egg chambers  
251 with DE-Cad antibody or imaging of endogenously RFP-tagged DE-Cad revealed strong  
252 colocalization between DE-Cad and Raskol ( $R=0.63$ ,  $n=15$ ) at the apical surface of PCs  
253 and at BC-BC contacts (Fig 5C and 5D). We also observed colocalization in the FE,  
254 particularly along the apical membrane (Fig 5A and 5C; S2A and S2B Fig). Raskol was  
255 not present at cell contacts between NCs (S2B Fig).

256         Next, we determined whether Raskol colocalizes with DE-Cad in other tissues  
257 that require AJ-mediated adhesion. Dorsal closure (DC) is an embryonic process in  
258 which the migrating ectoderm closes the dorsal hole [54-56]. The amnioserosa, an  
259 extra-embryonic tissue, covers the dorsal hole and contributes to ectodermal closure by  
260 providing contractile forces that pull the contralateral ectodermal sheets together [54,  
261 57, 58]. DC requires DE-Cad-mediated adhesion for ectodermal migration and fusion  
262 [59, 60]. To analyze Raskol and DE-Cad dynamics, we conducted time-lapse live  
263 imaging of embryos expressing YFP-tagged Raskol and RFP-tagged DE-Cad during  
264 DC. Colocalization of Raskol and DE-Cad was observed both at the amnioserosa cell  
265 contacts as well as in the dorsal most ectodermal cells at the zipper interface (S3A-D  
266 Fig). Raskol and DE-Cad colocalize in multiple *Drosophila* tissues, suggesting that  
267 Raskol may be a fundamental regulator of DE-Cad.

268 **Raskol regulates the distribution of polarized actin protrusions**

269 Analysis of Raskol-YFP protein localization in BC clusters revealed that  
270 cytoplasmic levels of Raskol were ~2x higher in PCs compared to BCs (S2B Fig and  
271 S4A Fig). Similarly, DE-Cad levels were up-regulated in PCs relative to BCs (Fig. 4A)  
272 [24] suggesting that Raskol protein expression pattern trends with DE-Cad. Accordingly,  
273 *shg* and *raskol* gene expression patterns overlap during embryonic development and  
274 both peak at 6-8hrs after egg laying (S4B Fig) [48]. To determine if Raskol is required  
275 for maintaining cell adhesions in PCs similar to BCs, we expressed *raskol* RNAi using  
276 *unpaired*-GAL4 (*upd*-GAL4) to drive expression specifically in the PCs [61]. Egg  
277 chambers were stained for F-actin (phalloidin) and nuclei (DAPI). Expression of control  
278 RNAi did not affect cluster adherence; however, *shg* RNAi expression caused cluster  
279 disassociation in ~80% egg chambers (Fig 6A, 6B and 6D), similar to a previous report  
280 [24]. Expression of *raskol* RNAi in PCs caused BC disassociation in 63% of egg  
281 chambers (Fig 6C and 6D), suggesting that Raskol and DE-Cad might function together  
282 to promote BC cluster adhesion in both PCs and BCs.

283 Next, we focused on the Raskol-YFP signal at the leading edge of the BC cluster  
284 (Fig 5B and 5D). Here, Raskol colocalized with actin suggesting that it may play a role  
285 in actin dynamics. Since Raskol contains a GAP domain and colocalizes with the  
286 cortical actin cytoskeleton in BCs, the FE, the amnioserosa and the dorsal most  
287 ectodermal cells [55, 60], we sought to determine whether it functions to regulate actin  
288 organization in BCs. We stained egg chambers expressing *raskol* RNAi in the BCs  
289 under the control of *slbo*-GAL4 driver for F-actin (phalloidin) and nuclei (DAPI) to assess  
290 F-actin distribution in the migrating cluster. In control BCs, actin accumulated at the  
291 base of protrusions typically oriented in the direction of migration (Fig 6E). In contrast,

292 downregulation of *raskol* resulted in dramatic formation of multiple ectopic actin patches  
293 around the BC cluster (Fig 6F and 6G).

294 We then performed time-lapse live imaging of BC clusters expressing UAS-  
295 lifeact-GFP under the control of *slbo*-GAL4 to analyze protrusion dynamics in more  
296 detail. In control egg chambers, we observed protrusions extending primarily from the  
297 front of the migrating cluster (Fig 6H, 6J-L; Movie 1). In contrast, when *raskol* was  
298 downregulated, protrusions extended indiscriminately around the cluster (Fig 6I-L;  
299 Movie 2), consistent with our previous observations. Interestingly, the number of front-  
300 oriented protrusions in control and *raskol* RNAi expressing BCs did not differ  
301 significantly (Fig 6K). These data suggest that Raskol acts to restrict actin protrusions to  
302 the front of the BC cluster, which is critical to regulate BC migration. In addition, *raskol*  
303 knockdown caused BC delamination defects (Movie 3) and cluster disassociation  
304 (Movie 4) thereby confirming its importance in controlling cell adhesion and providing  
305 initial mechanistic insight into its role in regulating actin dynamics.

## 306 **Discussion**

307 We combined evolution-guided bioinformatics with classical RNAi-based  
308 screening in *Drosophila* to identify regulators of DE-Cad-mediated cell adhesion. Our  
309 screen uncovered both established and novel regulators of DE-Cad function during BC  
310 migration. We demonstrated that one hit, the previously uncharacterized GAP domain  
311 containing protein Raskol, colocalizes with DE-Cad and regulates polarized actin  
312 dynamics in migrating BCs.

313 **ERC analysis reveals an evolutionary relationship between core components of**  
314 **the AJ**

315           The core AJ components *shg*,  $\alpha$ -Cat and *p120ctn* display high ERC values  
316 relative to one another, suggesting that the AJ complex has coevolved under selective  
317 pressure.  $\alpha$ -Catenin provides the mechanical link between the cadherin-catenin  
318 complex and the actin cytoskeleton. Actin linkage is believed to be the original,  
319 ancestral function of the adherens junction that provided the foundation for  
320 multicellularity [9], so it is not surprising that *shg* and  $\alpha$ -Cat, given their functional roles,  
321 have coevolved. Interestingly, p120-catenin is not essential for cadherin-mediated  
322 adhesion in flies [62], though it plays an important role in cadherin endocytosis in flies  
323 [63], similar to its established role in vertebrates [64]. Our ERC analysis suggests that  
324 shared selective pressures guided the evolution of the p120-catenin and DE-cadherin  
325 complex, and we speculate that these pressures may have shaped the range of p120-  
326 catenin functions in higher vertebrates.

327           Notably, no significant ERC relationship was observed between *shg* and *arm* or  
328 *shg* and other secondary AJ complex genes. While Arm is a core component of the AJ,  
329 it also functions as a key transcription factor in the Wnt signaling pathway [28, 29, 65].  
330 We speculate that Arm function in Wnt signalling placed additional evolutionary  
331 pressures and altered its ERC signature relative to the other AJ genes. Similarly, neither  
332 *cno* nor *vinc* showed a strong ERC relationship to AJ genes, possibly reflecting their  
333 individual roles in AJ-independent processes [31, 66].

334           A number of genes identified in the *shg* ERC analysis have been implicated in  
335 regulating cell adhesion (Fig 1, Table 1). However, many of ERC-identified genes have  
336 not been functionally associated with DE-Cad, the AJ or cell adhesion. A previous  
337 genomic RNAi screen conducted in *Drosophila* identified multiple regulators of DE-Cad



338 [43]. Notably, there was little overlap between the two screens. This highlights the  
339 potential of ERC analysis as an alternative, unbiased approach to generate a target  
340 gene list based solely on the evolutionary rate comparison. However, it is important to  
341 conduct secondary screens to validate the function of the target genes in a relevant  
342 biological system to eliminate false positives [16, 18, 19]. Also, ERC analysis cannot  
343 predict where (e.g., tissue type, cellular component) or when (e.g., developmental  
344 stage) a putative interaction will occur. Refinement of the *shg* ERC list based on spatio-  
345 temporal expression data can further eliminate false positive hits [19]. Nonetheless, a  
346 major advantage of ERC analysis is that genes that would otherwise not arise in a  
347 functional or associative genetic screen can be identified.

#### 348 **DE-Cad and its regulators are required for BC migration**

349 BC migration requires coordinated regulation of adhesion and motility [23, 67, 68]  
350 and is a good system for testing genes that regulate DE-Cad. BC migration is also an *in*  
351 *vivo* model for metastasis since many morphological characteristics of BCs resemble  
352 the invasive behaviour of metastatic cell clusters [68, 69]. However, in contrast to most  
353 models of epithelial-to-mesenchymal transition, the detachment of BC cluster requires  
354 upregulated levels of DE-Cad [23, 24]. DE-Cad-mediated adhesion between BCs and  
355 NCs is required for cluster polarization and directional migration, whereas adhesions  
356 between BCs and PCs are required for cluster adherence during migration [24, 25, 70].  
357 Thus, BC migration is a useful system for genetic studies of cell adhesion and offers an  
358 opportunity to explore the role of adhesion genes in a relevant disease model [68, 69].

359 Our secondary genetic screen of *shg* ERC hits revealed potential roles for  
360 number of genes in BC migration, including kinases, GTPase regulators, transcription

361 factors and cytoskeletal proteins. A small number of hits have putative or established  
362 roles in regulating DE-Cad and/or AJs. For example, PDZ-GEF was shown to colocalize  
363 with DE-Cad and function through GTPase Rap1 to regulate DE-Cad at the cell  
364 membrane [34, 35]. Hrb98DE is an RNA-binding protein that regulates DE-Cad mRNA  
365 processing [32, 33]. Mammalian orthologs of the small GTPase Rab5 regulate E-Cad  
366 trafficking [40, 42]. The mammalian homolog of transcription factor CG16952, Btbd7,  
367 regulates E-Cad expression [38, 39]. Additionally, genes such as *RhoGAPpp190*, *Stim*,  
368 *Appl* and *Rab5* were also identified in functional and proteomics screens of E-Cad [43,  
369 44]. We also identified numerous genes that have not been linked to DE-Cad, including  
370 *raskol*, *CG11593*, *babo* and *zormin*. Out of these genes, *raskol*, *CG11593* and *babo*  
371 directly regulate DE-Cad levels at the BC-BC contacts (Fig 4). Using *shg* ERC analysis  
372 and BC migration as a genetic model we have identified multiple novel genes that  
373 function to regulate DE-Cad-mediated cell adhesion in *Drosophila*.

#### 374 **Raskol is a putative regulator of cell adhesion, polarity and actin dynamics**

375 Downregulation of *raskol* caused severe BC cluster disassociation suggesting  
376 that Raskol is a critical regulator of BC adhesion. Consistent with this, Raskol  
377 colocalized with DE-Cad in multiple cell types and knockdown of *raskol* reduced DE-  
378 Cad levels at BC-BC cell contacts. Like *shg*, *raskol* is significantly upregulated in PCs  
379 relative to BCs and NCs. The encoded protein contains a highly conserved GAP domain  
380 that displays homology towards Ras- and Rho-GAPs, a plekstrin homology (PH) domain  
381 and a C2 domain that likely promote its membrane localization [71]. This suggests that,  
382 by colocalizing with DE-Cad, Raskol regulates adhesive strength between BCs to  
383 maintain cluster adhesion during detachment from the FE and subsequent migration.

384 The mammalian orthologs of Raskol, Rasal2 and Dab2IP, were identified in a screen for  
385 RasGAP tumour suppressors [71] and are frequently downregulated in multiple types of  
386 cancer cells [53, 72-75]. Rasal2 and Dab2IP are capable of inactivating Ras through  
387 inducing GTP hydrolysis through their GAP domain and their downregulation leads to  
388 Ras overactivation [76-78]. Furthermore, inactivation of Rasal2 promotes invasive  
389 behaviour in a cell migration assay suggesting that Rasal2 has a conserved role in  
390 regulating cell adhesion and protrusive behaviour in mammals [71]. Dab2IP was  
391 identified in cadherin proximity biotinylation screens in mammalian epithelial cells [44]  
392 and mouse neonatal cardiomyocytes [79], further suggesting that the  
393 Rasal2/Dab2IP/Raskol family of proteins regulate AJ biology. Nonetheless, the  
394 mechanism of their function remains unclear.

395 Our study offers potential insight into Raskol function during collective migration.  
396 Epidermal growth factor receptor (EGFR) and PDGF- and VEGF-related receptor (PVR)  
397 localize to the leading edge of BC clusters and respond to a presumed gradient of  
398 guidance cues originating from the oocyte [67, 80-82]. The BC with the highest levels of  
399 EGFR/PVR activation becomes the leader cell and relays a signal to neighboring BCs  
400 through the DE-Cad adhesion complex to inhibit protrusion formation at the sides or  
401 rear of the cluster [24]. Interestingly, *gurken*, which encodes one of the four ligands for  
402 EGFR [81, 83, 84], also appeared on the *shg* ERC list (ERC value 0.62) as did its  
403 receptor *Egfr* (epidermal growth factor receptor, ERC value 0.36; S1 Table). The  
404 presence of both ligand and receptor suggests that EGF signaling has coevolved with  
405 DE-Cad to regulate cell adhesion. The primary GTPase that functions to regulate the  
406 directional migration of BC downstream of EGFR and PVR is Rac1, a member of the

407 Rho GTPase family of proteins. We propose that Raskol, as a GAP, may function to  
408 suppress Rac1 signalling in non-leader BCs. Rac1 is expressed in all BCs, but the  
409 leader cells exhibit higher activity due to increased activation of EGFR and PVR [24, 80,  
410 85]. Our results show that Raskol, like EGFR, PVR and Rac1 [80, 81, 85], restricts  
411 protrusions to the front of migrating BC cluster thus ensuring unidirectional migration.  
412 Downregulation of DE-Cad causes disruption in the polarized distribution of Rac1 in BC  
413 clusters, suggesting that DE-Cad regulates signaling downstream of EGFR and PVR  
414 [24, 86]. Therefore, Rac1 suppression might be achieved through Raskol GAP activity  
415 since knockdown of Rac1 or Raskol produce similar protrusion phenotypes [85]. Raskol  
416 may buffer the DE-Cad/Rac/actin mechanical feedback loop to regulate cell adhesion  
417 and promote collective cell migration. Whether Raskol directly interacts and regulates  
418 the GTPase domain of Rac1 remains to be explored.

419 Raskol localization is polarized with highest levels observed at the apical domain  
420 of ectodermal cells, FE cells and PCs. We also observe Raskol localization in the  
421 leading protrusion of BC cluster. This suggests that Raskol might regulate actin  
422 dynamics at the apical domain of polarized cells. However, Raskol does not directly  
423 regulate formation of protrusions since reducing Raskol levels does not affect the  
424 prevalence of leading protrusions. We predict that in leading BCs, Raskol limits active  
425 Rac1 to the tip of the protrusion to induce localized actin cytoskeletal remodelling.  
426 Accordingly, as reported by a Rac1-FRET sensor, high Rac1 activity is limited at the  
427 lamellopodial tip in the leading BC [24]. Overall, these data highlights two potential roles  
428 of Raskol function: 1) Raskol functions as a putative regulator of cell adhesion, and 2)  
429 Raskol regulates actin dynamics of the migrating cluster downstream of receptor

430 tyrosine kinase signaling in BCs. Future studies dissecting the role of Raskol and other  
431 genes identified in our study are expected to offer insight in to the cooperative role of  
432 proteins that function along with the AJ to promote cell adhesion and cell migration.  
433

## 434 **Methods and Materials**

### 435 **Evolutionary Rate Covariance analysis**

436 ERC values were calculated from protein coding sequences from 22 *Drosophila*  
437 species: *D. ananassae*, *D. biarmipes*, *D. bipectinada*, *D. elegans*, *D. erecta*, *D.*  
438 *eugracilis*, *D. ficusphila*, *D. grimshawi*, *D. kikawaii*, *D. persimilis*, *D. pseudoobscura*, *D.*  
439 *melanogaster*, *D. miranda*, *D. mojavensis*, *D. rhopaloa*, *D. sechelia*, *D. simulans*, *D.*  
440 *suzukii*, *D. takahashii*, *D. virilis*, *D. willistoni*, and *D. yakuba*. Protein coding sequences  
441 were downloaded from the Flybase website (<http://www.flybase.org/>) or the NCBI  
442 genome annotation website ([https://www.ncbi.nlm.nih.gov/genome/annotation\\_euk/all/](https://www.ncbi.nlm.nih.gov/genome/annotation_euk/all/)).  
443 Initially, coding sequences were evaluated for internal stop codons and the sequence  
444 was removed if found. For genes with multiple transcripts, the transcript with the longest  
445 sequence size was selected to represent the gene.

446 Orthology between genes across the multiple species were determined using the  
447 Orthofinder algorithm [87]. For each orthogroup, which are sets of genes that are  
448 orthologs and/or recent paralogs to each other, we omitted paralogous genes. Only  
449 orthogroups that had at least 6 species representation were analyzed further. Gene  
450 members of each orthogroup were aligned to each other using the PRANK aligner [88].  
451 The multisequence alignment of each orthogroup was used by the PAML aaml program  
452 [89] to estimate the evolutionary rates on a single fixed species topology. A single  
453 species topology was estimated using a supertrees approach by combining individual  
454 orthogroup topologies that were estimated using RAxML [90]. Trees were combined  
455 using the matrix representation method implemented in phytools [91]

456 ERC was calculated using the branch lengths of each orthogroup. The overall

457 species phylogenetic rates were normalized out for each orthogroup's evolutionary rate,  
458 as described previously [18, 19]. Afterwards, ERC was measured as the Kendall's  $\tau$   
459 correlation coefficients between two orthogroups and their species phylogeny  
460 normalized relative rates. ERC was then calculated for all pairwise orthogroup  
461 combinations.

## 462 **Gene ontology analysis**

463 The *Drosophila* gene lists were subjected to GO analysis using Flybase website  
464 (<http://www.flybase.org/>). Homologs of *Drosophila* genes in mammalian genomes were  
465 generated using Flybase website (<http://www.flybase.org/>). A mammalian gene was  
466 considered a homolog if the gene was reported by 45% or more algorithms. Mammalian  
467 homologs were analyzed for canonical pathway and disease & function enrichment  
468 using Ingenuity Pathway Analysis tools  
469 (<https://www.qiagenbioinformatics.com/products/ingenuity-pathway-analysis/>).

## 470 ***Drosophila melanogaster* strains**

471 All GAL4, reporter TRAP and RNAi stocks were obtained from Bloomington  
472 *Drosophila* Stock Center (BDSC) (S4 Table). *DE-Cad-GFP* and *DE-Cad-mCherry*  
473 knock-in stocks were used as E-Cad reporters [49]. *slbo*-GAL4, UAS-lifect-GFP, UAS-  
474 LacZ stock was generously provided by Jiong Chen (Nanjing University) [92]. Fly stocks  
475 were raised on standard yeast-based media at 20°C, unless otherwise noted.

## 476 **BC migration screen**

477 For BC migration analysis, RNAi-expressing female flies under the control of  
478 *slbo*-GAL4 were collected and transferred to vials containing fresh yeast paste and  
479 males. Flies were raised at 29°C for 1-2 days. UAS-GFP was used as a reporter for

480 RNAi expression. Dissected ovaries were fixed in 4% paraformaldehyde in PBS for 20  
481 mins and washed 5 times with PBS. Ovaries were mounted on microscope slides in  
482 70% glycerol and 20  $\mu$ m z-stacks were acquired with a 20x objective on Nikon A1  
483 scanning confocal microscope.

#### 484 **Immunostaining of egg chambers**

485 1-2 day old females were incubated at 29°C for 1-2 days in vials with fresh yeast  
486 paste and males. Ovaries were dissected, fixed in 4% paraformaldehyde for 20 mins in  
487 PBS with 0.1% Triton-X (PBST), washed 5 times with PBST and blocked in normal goat  
488 serum (NGS) for 30 mins. For primary antibody staining, ovaries were incubated with  
489 Dcad2 antibody (1:100, Developmental Studies Hybridoma Bank) overnight at 4°C and  
490 washed 10 times the next day over 1 hour. Next, ovaries were incubated with Alexa  
491 Fluor-conjugated secondary antibody (1:150, Thermo Fisher Scientific) and Alexa 647  
492 phalloidin (1:150, Thermo Fisher Scientific) for 2 hours. Egg chambers were then  
493 incubated in DAPI for 10 mins. Ovaries were washed 5 times in PBST and washed  
494 overnight and washed again 5 times next morning. Ovaries were stored and mounted  
495 on microscope slide in 70% glycerol and then imaged as described previously.

#### 496 **Live imaging of BC clusters**

497 Male flies containing *slbo*-GAL4, UAS-lifeact-GFP and UAS-LacZ were crossed  
498 to UAS-*raskol*-RNAi females. 1-2 day old F1 females were incubated at 29°C for 1-2  
499 days in vials with fresh yeast paste and *slbo*-GAL4, UAS-lifeact-GFP males. Ovaries  
500 were dissected for live imaging in imaging media (Schneiders's medium, 15% fetal  
501 bovine serum (FBS) and 0.2mg/ml Insulin; Thermo Fisher Scientific) according to  
502 published protocols [22, 93]. 100  $\mu$ l of imaging media containing egg chambers was



503 transferred to poly-D-lysine coated Mattek dishes for imaging. 20  $\mu\text{m}$  Z-stacks (1  $\mu\text{m}$   
504 step size) covering the whole migrating border cell cluster were acquired every 2  
505 minutes using a 40x objective on a Nikon A1 scanning confocal microscope.

#### 506 **Live imaging of Raskol-YFP in embryos**

507 Raskol-YFP [51] homozygous female flies were crossed to *DE-Cad-mCherry* [49]  
508 homozygous males. Embryos were collected overnight on grape juice agar plates and  
509 transferred to microscope slides coated with double-sided tape. Embryos were manually  
510 dechorionated and immediately transferred to halocarbon oil on coverslips with the  
511 dorsal side facing down. Coverslips were then attached to imaging chambers using  
512 double sided tape and imaged using a 60x objective on a Nikon A1 scanning confocal  
513 microscope.

#### 514 **Quantification and statistics**

515 Border cell migration defects were quantified as described previously [24]. Stage  
516 10 egg chambers were analysed for each genotype. Border cell position along the  
517 migratory path was assigned into one of the following categories: 0-25% (no migration),  
518 25-75% (delayed migration) and 75-100% (completed migration).

519 To quantify defects in border cell cluster adhesion, we determined the percentage of  
520 egg chambers where individual border cells had detached from the cluster.

521 To quantify DE-Cad levels, linescans across the BC-BC contacts were used to  
522 calculate the maximum pixel intensity at the contact in ImageJ. Peak values were then  
523 normalized to the peak intensity values of cell-cell contacts between NCs for each egg  
524 chamber. One-way ANOVA followed by Mann-Whitney tests were performed to

525 determine significance. At least 22 border cell clusters (3 cell contacts per cluster) were  
526 imaged for each genotype.

527 To measure cytoplasmic levels of Raskol, an ROI was drawn in the cytoplasm of  
528 polar and border cells and average intensity determined. The ROI intensity was  
529 normalized to the average cytoplasmic intensity of Raskol-YFP in the nurse cells. To  
530 quantify colocalization of DE-Cad and Raskol, Pearson's correlation coefficient (R) was  
531 calculated using the JACop plugin in ImageJ.

532 Ectopic actin patch number was quantified as described [92]. Actin patch present  
533 at the base of the leading edge protrusion was excluded from quantification since it is  
534 not ectopic. Welch's t-test was performed to statistically compare number of ectopic  
535 actin patches between samples.

536 To quantify protrusion direction, we measured protrusions around the BC cluster  
537 in 45° increments at each frame of the movie (16 frames from 8 movies for each  
538 genotype). Protrusions between 315° and 45° angles were considered frontal  
539 protrusions; between 45° and 135° and 225° and 315° as middle protrusions; and  
540 between 225° and 135° as rear protrusions. Mann-Whitney test was performed to  
541 statistically compare number of protrusions between samples.

## 542 **Acknowledgements**

543 We would like to thank Dr. Jiong Chen for providing *s/lbo*-lifeact-GFP stock and  
544 Bloomington Drosophila Stock Center for providing GAL4 and RNAi stocks. We also  
545 thank members of the Kwiatkowski lab for critical feedback on the manuscript.

546

## 547 **References**

- 548 1. Harris TJ, Tepass U. Adherens junctions: from molecules to morphogenesis.  
549 Nature reviews Molecular cell biology. 2010;11(7):502-14. doi: 10.1038/nrm2927.  
550 PubMed PMID: 20571587.
- 551 2. Mege RM, Ishiyama N. Integration of Cadherin Adhesion and Cytoskeleton at  
552 Adherens Junctions. Cold Spring Harb Perspect Biol. 2017;9(5). Epub 2017/01/18. doi:  
553 10.1101/cshperspect.a028738. PubMed PMID: 28096263.
- 554 3. Yap AS, Gomez GA, Parton RG. Adherens Junctions Revisualized: Organizing  
555 Cadherins as Nanoassemblies. Dev Cell. 2015;35(1):12-20. Epub 2015/10/16. doi:  
556 10.1016/j.devcel.2015.09.012. PubMed PMID: 26460944.
- 557 4. Brunet T, King N. The Origin of Animal Multicellularity and Cell Differentiation.  
558 Dev Cell. 2017;43(2):124-40. Epub 2017/10/25. doi: 10.1016/j.devcel.2017.09.016.  
559 PubMed PMID: 29065305; PubMed Central PMCID: PMC6089241.
- 560 5. Miller PW, Clarke DN, Weis WI, Lowe CJ, Nelson WJ. The evolutionary origin of  
561 epithelial cell-cell adhesion mechanisms. Curr Top Membr. 2013;72:267-311. Epub  
562 2013/11/12. doi: 10.1016/B978-0-12-417027-8.00008-8. PubMed PMID: 24210433;  
563 PubMed Central PMCID: PMC4118598.
- 564 6. Hulpiou P, Gul IS, van Roy F. New insights into the evolution of metazoan  
565 cadherins and catenins. Prog Mol Biol Transl Sci. 2013;116:71-94. Epub 2013/03/14.  
566 doi: 10.1016/B978-0-12-394311-8.00004-2. PubMed PMID: 23481191.
- 567 7. Miller PW, Pokutta S, Mitchell JM, Chodaparambil JV, Clarke DN, Nelson WJ, et  
568 al. Analysis of a vinculin homolog in a sponge (phylum Porifera) reveals that vertebrate-  
569 like cell adhesions emerged early in animal evolution. J Biol Chem.  
570 2018;293(30):11674-86. Epub 2018/06/09. doi: 10.1074/jbc.RA117.001325. PubMed  
571 PMID: 29880641; PubMed Central PMCID: PMC6066325.
- 572 8. Murray PS, Zaidel-Bar R. Pre-metazoan origins and evolution of the cadherin  
573 adhesome. Biol Open. 2014;3(12):1183-95. Epub 2014/11/15. doi:  
574 10.1242/bio.20149761. PubMed PMID: 25395670; PubMed Central PMCID:  
575 PMC4265756.
- 576 9. Rubsam M, Broussard JA, Wickstrom SA, Nekrasova O, Green KJ, Niessen CM.  
577 Adherens Junctions and Desmosomes Coordinate Mechanics and Signaling to  
578 Orchestrate Tissue Morphogenesis and Function: An Evolutionary Perspective. Cold  
579 Spring Harb Perspect Biol. 2017. Epub 2017/09/13. doi: 10.1101/cshperspect.a029207.  
580 PubMed PMID: 28893859.
- 581 10. Meng W, Takeichi M. Adherens junction: molecular architecture and regulation.  
582 Cold Spring Harb Perspect Biol. 2009;1(6):a002899. doi:

- 583 10.1101/cshperspect.a002899. PubMed PMID: 20457565; PubMed Central PMCID:  
584 PMC2882120.
- 585 11. Menke A, Giehl K. Regulation of adherens junctions by Rho GTPases and p120-  
586 catenin. *Archives of biochemistry and biophysics*. 2012;524(1):48-55. doi:  
587 10.1016/j.abb.2012.04.019. PubMed PMID: 22583808.
- 588 12. Bertocchi C, Vaman Rao M, Zaidel-Bar R. Regulation of adherens junction  
589 dynamics by phosphorylation switches. *Journal of signal transduction*.  
590 2012;2012:125295. doi: 10.1155/2012/125295. PubMed PMID: 22848810; PubMed  
591 Central PMCID: PMC3403498.
- 592 13. Padmanabhan A, Rao MV, Wu Y, Zaidel-Bar R. Jack of all trades: functional  
593 modularity in the adherens junction. *Curr Opin Cell Biol*. 2015;36:32-40. Epub  
594 2015/07/21. doi: 10.1016/j.ceb.2015.06.008. PubMed PMID: 26189061.
- 595 14. Garcia MA, Nelson WJ, Chavez N. Cell-Cell Junctions Organize Structural and  
596 Signaling Networks. *Cold Spring Harb Perspect Biol*. 2018;10(4). Epub 2017/06/11. doi:  
597 10.1101/cshperspect.a029181. PubMed PMID: 28600395; PubMed Central PMCID:  
598 PMCPMC5773398.
- 599 15. Clark NL, Alani E, Aquadro CF. Evolutionary rate covariation in meiotic proteins  
600 results from fluctuating evolutionary pressure in yeasts and mammals. *Genetics*.  
601 2013;193(2):529-38. doi: 10.1534/genetics.112.145979. PubMed PMID: 23183665;  
602 PubMed Central PMCID: PMC3567741.
- 603 16. Findlay GD, Sitnik JL, Wang W, Aquadro CF, Clark NL, Wolfner MF. Evolutionary  
604 rate covariation identifies new members of a protein network required for *Drosophila*  
605 *melanogaster* female post-mating responses. *PLoS genetics*. 2014;10(1):e1004108.  
606 doi: 10.1371/journal.pgen.1004108. PubMed PMID: 24453993; PubMed Central  
607 PMCID: PMC3894160.
- 608 17. Wolfe NW, Clark NL. ERC analysis: web-based inference of gene function via  
609 evolutionary rate covariation. *Bioinformatics*. 2015;31(23):3835-7. doi:  
610 10.1093/bioinformatics/btv454. PubMed PMID: 26243019; PubMed Central PMCID:  
611 PMC4751245.
- 612 18. Priedigkeit N, Wolfe N, Clark NL. Evolutionary signatures amongst disease  
613 genes permit novel methods for gene prioritization and construction of informative gene-  
614 based networks. *PLoS genetics*. 2015;11(2):e1004967. doi:  
615 10.1371/journal.pgen.1004967. PubMed PMID: 25679399; PubMed Central PMCID:  
616 PMC4334549.
- 617 19. Clark NL, Alani E, Aquadro CF. Evolutionary rate covariation reveals shared  
618 functionality and coexpression of genes. *Genome research*. 2012;22(4):714-20. doi:  
619 10.1101/gr.132647.111. PubMed PMID: 22287101; PubMed Central PMCID:  
620 PMC3317153.

- 621 20. Godin SK, Meslin C, Kabbinavar F, Bratton-Palmer DS, Hornack C, Mihalevic  
622 MJ, et al. Evolutionary and functional analysis of the invariant SWIM domain in the  
623 conserved Shu2/SWS1 protein family from *Saccharomyces cerevisiae* to *Homo*  
624 *sapiens*. *Genetics*. 2015;199(4):1023-33. doi: 10.1534/genetics.114.173518. PubMed  
625 PMID: 25659377; PubMed Central PMCID: PMC4391554.
- 626 21. Ziegler AB, Augustin H, Clark NL, Berthelot-Grosjean M, Simonnet MM, Steinert  
627 JR, et al. The Amino Acid Transporter Jhl-21 Coevolves with Glutamate Receptors,  
628 Impacts NMJ Physiology, and Influences Locomotor Activity in *Drosophila* Larvae.  
629 *Scientific reports*. 2016;6:19692. doi: 10.1038/srep19692. PubMed PMID: 26805723;  
630 PubMed Central PMCID: PMC4726445.
- 631 22. Prasad M, Wang X, He L, Cai D, Montell DJ. Border Cell Migration: A Model  
632 System for Live Imaging and Genetic Analysis of Collective Cell Movement. *Methods in*  
633 *molecular biology*. 2015;1328:89-97. doi: 10.1007/978-1-4939-2851-4\_6. PubMed  
634 PMID: 26324431; PubMed Central PMCID: PMC4762686.
- 635 23. Montell DJ, Yoon WH, Starz-Gaiano M. Group choreography: mechanisms  
636 orchestrating the collective movement of border cells. *Nature reviews Molecular cell*  
637 *biology*. 2012;13(10):631-45. doi: 10.1038/nrm3433. PubMed PMID: 23000794;  
638 PubMed Central PMCID: PMC4099007.
- 639 24. Cai D, Chen SC, Prasad M, He L, Wang X, Choesmel-Cadamuro V, et al.  
640 Mechanical feedback through E-cadherin promotes direction sensing during collective  
641 cell migration. *Cell*. 2014;157(5):1146-59. doi: 10.1016/j.cell.2014.03.045. PubMed  
642 PMID: 24855950; PubMed Central PMCID: PMC4118667.
- 643 25. Niewiadomska P, Godt D, Tepass U. DE-Cadherin is required for intercellular  
644 motility during *Drosophila* oogenesis. *The Journal of cell biology*. 1999;144(3):533-47.  
645 PubMed PMID: 9971747; PubMed Central PMCID: PMC2132905.
- 646 26. Fulga TA, Rorth P. Invasive cell migration is initiated by guided growth of long  
647 cellular extensions. *Nature cell biology*. 2002;4(9):715-9. Epub 2002/08/29. doi:  
648 10.1038/ncb848. PubMed PMID: 12198500.
- 649 27. Harris TJ. Adherens junction assembly and function in the *Drosophila* embryo.  
650 *International review of cell and molecular biology*. 2012;293:45-83. doi: 10.1016/B978-  
651 0-12-394304-0.00007-5. PubMed PMID: 22251558.
- 652 28. Mosimann C, Hausmann G, Basler K. Beta-catenin hits chromatin: regulation of  
653 Wnt target gene activation. *Nature reviews Molecular cell biology*. 2009;10(4):276-86.  
654 doi: 10.1038/nrm2654. PubMed PMID: 19305417.
- 655 29. Clevers H, Nusse R. Wnt/beta-catenin signaling and disease. *Cell*.  
656 2012;149(6):1192-205. doi: 10.1016/j.cell.2012.05.012. PubMed PMID: 22682243.
- 657 30. Atherton P, Stutchbury B, Jethwa D, Ballestrem C. Mechanosensitive  
658 components of integrin adhesions: Role of vinculin. *Experimental cell research*.

- 659 2016;343(1):21-7. doi: 10.1016/j.yexcr.2015.11.017. PubMed PMID: 26607713;  
660 PubMed Central PMCID: PMC4856733.
- 661 31. Mandai K, Rikitake Y, Shimono Y, Takai Y. Afadin/AF-6 and canoe: roles in cell  
662 adhesion and beyond. *Prog Mol Biol Transl Sci.* 2013;116:433-54. doi: 10.1016/B978-0-  
663 12-394311-8.00019-4. PubMed PMID: 23481206.
- 664 32. Kourtidis A, Ngok SP, Pulimeno P, Feathers RW, Carpio LR, Baker TR, et al.  
665 Distinct E-cadherin-based complexes regulate cell behaviour through miRNA  
666 processing or Src and p120 catenin activity. *Nature cell biology.* 2015;17(9):1145-57.  
667 doi: 10.1038/ncb3227. PubMed PMID: 26302406; PubMed Central PMCID:  
668 PMC4975377.
- 669 33. Ji Y, Tulin AV. Poly(ADP-ribose) controls DE-cadherin-dependent stem cell  
670 maintenance and oocyte localization. *Nature communications.* 2012;3:760. doi:  
671 10.1038/ncomms1759. PubMed PMID: 22453833; PubMed Central PMCID:  
672 PMC3319983.
- 673 34. Boettner B, Van Aelst L. The Rap GTPase activator Drosophila PDZ-GEF  
674 regulates cell shape in epithelial migration and morphogenesis. *Molecular and cellular  
675 biology.* 2007;27(22):7966-80. doi: 10.1128/MCB.01275-07. PubMed PMID: 17846121;  
676 PubMed Central PMCID: PMC2169160.
- 677 35. Spahn P, Ott A, Reuter R. The PDZ-GEF protein Dizzy regulates the  
678 establishment of adherens junctions required for ventral furrow formation in Drosophila.  
679 *Journal of cell science.* 2012;125(Pt 16):3801-12. doi: 10.1242/jcs.101196. PubMed  
680 PMID: 22553205.
- 681 36. Rudini N, Felici A, Giampietro C, Lampugnani M, Corada M, Swirsding K, et al.  
682 VE-cadherin is a critical endothelial regulator of TGF-beta signalling. *The EMBO journal.*  
683 2008;27(7):993-1004. doi: 10.1038/emboj.2008.46. PubMed PMID: 18337748; PubMed  
684 Central PMCID: PMC2323269.
- 685 37. Fornetti J, Flanders KC, Henson PM, Tan AC, Borges VF, Schedin P. Mammary  
686 epithelial cell phagocytosis downstream of TGF-beta3 is characterized by adherens  
687 junction reorganization. *Cell death and differentiation.* 2016;23(2):185-96. doi:  
688 10.1038/cdd.2015.82. PubMed PMID: 26113040; PubMed Central PMCID:  
689 PMC4716300.
- 690 38. Onodera T, Sakai T, Hsu JC, Matsumoto K, Chiorini JA, Yamada KM. Btbd7  
691 regulates epithelial cell dynamics and branching morphogenesis. *Science.*  
692 2010;329(5991):562-5. doi: 10.1126/science.1191880. PubMed PMID: 20671187;  
693 PubMed Central PMCID: PMC3412157.
- 694 39. Fan C, Miao Y, Zhang X, Liu D, Jiang G, Lin X, et al. Btbd7 contributes to  
695 reduced E-cadherin expression and predicts poor prognosis in non-small cell lung  
696 cancer. *BMC cancer.* 2014;14:704. doi: 10.1186/1471-2407-14-704. PubMed PMID:  
697 25253020; PubMed Central PMCID: PMC4189533.

- 698 40. Yang J, Yao W, Qian G, Wei Z, Wu G, Wang G. Rab5-mediated VE-cadherin  
699 internalization regulates the barrier function of the lung microvascular endothelium.  
700 Cellular and molecular life sciences : CMLS. 2015;72(24):4849-66. doi:  
701 10.1007/s00018-015-1973-4. PubMed PMID: 26112597; PubMed Central PMCID:  
702 PMC4827161.
- 703 41. Woichansky I, Beretta CA, Berns N, Riechmann V. Three mechanisms control E-  
704 cadherin localization to the zonula adherens. Nature communications. 2016;7:10834.  
705 doi: 10.1038/ncomms10834. PubMed PMID: 26960923; PubMed Central PMCID:  
706 PMC4792928.
- 707 42. Saitoh S, Maruyama T, Yako Y, Kajita M, Fujioka Y, Ohba Y, et al. Rab5-  
708 regulated endocytosis plays a crucial role in apical extrusion of transformed cells.  
709 Proceedings of the National Academy of Sciences of the United States of America.  
710 2017;114(12):E2327-E36. doi: 10.1073/pnas.1602349114. PubMed PMID: 28270608;  
711 PubMed Central PMCID: PMC5373379.
- 712 43. Toret CP, D'Ambrosio MV, Vale RD, Simon MA, Nelson WJ. A genome-wide  
713 screen identifies conserved protein hubs required for cadherin-mediated cell-cell  
714 adhesion. The Journal of cell biology. 2014;204(2):265-79. doi: 10.1083/jcb.201306082.  
715 PubMed PMID: 24446484; PubMed Central PMCID: PMC3897182.
- 716 44. Guo Z, Neilson LJ, Zhong H, Murray PS, Zanivan S, Zaidel-Bar R. E-cadherin  
717 interactome complexity and robustness resolved by quantitative proteomics. Science  
718 signaling. 2014;7(354):rs7. doi: 10.1126/scisignal.2005473. PubMed PMID: 25468996;  
719 PubMed Central PMCID: PMC4972397.
- 720 45. Van Itallie CM, Tietgens AJ, Aponte A, Fredriksson K, Fanning AS, Gucek M, et  
721 al. Biotin ligase tagging identifies proteins proximal to E-cadherin, including lipoma  
722 preferred partner, a regulator of epithelial cell-cell and cell-substrate adhesion. Journal  
723 of cell science. 2014;127(Pt 4):885-95. Epub 2013/12/18. doi: 10.1242/jcs.140475.  
724 PubMed PMID: 24338363; PubMed Central PMCID: PMCPMC3924204.
- 725 46. Montell DJ, Rorth P, Spradling AC. slow border cells, a locus required for a  
726 developmentally regulated cell migration during oogenesis, encodes Drosophila C/EBP.  
727 Cell. 1992;71(1):51-62. PubMed PMID: 1394432.
- 728 47. Rorth P, Szabo K, Bailey A, Laverty T, Rehm J, Rubin GM, et al. Systematic  
729 gain-of-function genetics in Drosophila. Development. 1998;125(6):1049-57. PubMed  
730 PMID: 9463351.
- 731 48. Contrino S, Smith RN, Butano D, Carr A, Hu F, Lyne R, et al. modMine: flexible  
732 access to modENCODE data. Nucleic acids research. 2012;40(Database issue):D1082-  
733 8. doi: 10.1093/nar/gkr921. PubMed PMID: 22080565; PubMed Central PMCID:  
734 PMC3245176.
- 735 49. Huang J, Zhou W, Dong W, Watson AM, Hong Y. From the Cover: Directed,  
736 efficient, and versatile modifications of the Drosophila genome by genomic engineering.

- 737 Proceedings of the National Academy of Sciences of the United States of America.  
738 2009;106(20):8284-9. doi: 10.1073/pnas.0900641106. PubMed PMID: 19429710;  
739 PubMed Central PMCID: PMC2688891.
- 740 50. Cho KS, Lee JH, Kim S, Kim D, Koh H, Lee J, et al. Drosophila phosphoinositide-  
741 dependent kinase-1 regulates apoptosis and growth via the phosphoinositide 3-kinase-  
742 dependent signaling pathway. Proceedings of the National Academy of Sciences of the  
743 United States of America. 2001;98(11):6144-9. doi: 10.1073/pnas.101596998. PubMed  
744 PMID: 11344272; PubMed Central PMCID: PMC33436.
- 745 51. Lye CM, Naylor HW, Sanson B. Subcellular localisations of the CPTI collection of  
746 YFP-tagged proteins in Drosophila embryos. Development. 2014;141(20):4006-17. doi:  
747 10.1242/dev.111310. PubMed PMID: 25294944; PubMed Central PMCID:  
748 PMC4197698.
- 749 52. Thul PJ, Akesson L, Wiking M, Mahdessian D, Geladaki A, Ait Blal H, et al. A  
750 subcellular map of the human proteome. Science. 2017;356(6340). doi:  
751 10.1126/science.aal3321. PubMed PMID: 28495876.
- 752 53. Jia Z, Liu W, Gong L, Xiao Z. Downregulation of RASAL2 promotes the  
753 proliferation, epithelial-mesenchymal transition and metastasis of colorectal cancer  
754 cells. Oncology letters. 2017;13(3):1379-85. doi: 10.3892/ol.2017.5581. PubMed PMID:  
755 28454265; PubMed Central PMCID: PMC5403410.
- 756 54. Hayes P, Solon J. Drosophila dorsal closure: An orchestra of forces to zip shut  
757 the embryo. Mechanisms of development. 2017;144(Pt A):2-10. doi:  
758 10.1016/j.mod.2016.12.005. PubMed PMID: 28077304.
- 759 55. Kiehart DP, Crawford JM, Aristotelous A, Venakides S, Edwards GS. Cell Sheet  
760 Morphogenesis: Dorsal Closure in Drosophila melanogaster as a Model System. Annual  
761 review of cell and developmental biology. 2017;33:169-202. doi: 10.1146/annurev-  
762 cellbio-111315-125357. PubMed PMID: 28992442.
- 763 56. Heisenberg CP. Dorsal closure in Drosophila: cells cannot get out of the tight  
764 spot. BioEssays : news and reviews in molecular, cellular and developmental biology.  
765 2009;31(12):1284-7. doi: 10.1002/bies.200900109. PubMed PMID: 19882683.
- 766 57. Kiehart DP, Galbraith CG, Edwards KA, Rickoll WL, Montague RA. Multiple  
767 forces contribute to cell sheet morphogenesis for dorsal closure in Drosophila. The  
768 Journal of cell biology. 2000;149(2):471-90. PubMed PMID: 10769037; PubMed Central  
769 PMCID: PMC2175161.
- 770 58. Lynch HE, Crews SM, Rosenthal B, Kim E, Gish R, Echiverri K, et al. Cellular  
771 mechanics of germ band retraction in Drosophila. Developmental biology.  
772 2013;384(2):205-13. doi: 10.1016/j.ydbio.2013.10.005. PubMed PMID: 24135149;  
773 PubMed Central PMCID: PMC3856716.



- 774 59. Gorfinkiel N, Arias AM. Requirements for adherens junction components in the  
775 interaction between epithelial tissues during dorsal closure in *Drosophila*. *Journal of cell*  
776 *science*. 2007;120(18):3289-98. doi: 10.1242/jcs.010850. PubMed PMID:  
777 WOS:000249559400015.
- 778 60. Duque J, Gorfinkiel N. Integration of actomyosin contractility with cell-cell  
779 adhesion during dorsal closure. *Development*. 2016;143(24):4676-86. doi:  
780 10.1242/dev.136127. PubMed PMID: WOS:000393454600012.
- 781 61. Beccari S, Teixeira L, Rorth P. The JAK/STAT pathway is required for border cell  
782 migration during *Drosophila* oogenesis. *Mechanisms of development*. 2002;111(1-  
783 2):115-23. Epub 2002/01/24. PubMed PMID: 11804783.
- 784 62. Myster SH, Cavallo R, Anderson CT, Fox DT, Peifer M. *Drosophila* p120catenin  
785 plays a supporting role in cell adhesion but is not an essential adherens junction  
786 component. *Journal of Cell Biology*. 2003;160(3):433-49. doi: 10.1083/jcb.200211083.  
787 PubMed PMID: WOS:000180840800017.
- 788 63. Bulgakova NA, Brown NH. *Drosophila* p120-catenin is crucial for endocytosis of  
789 the dynamic E-cadherin-Bazooka complex. *Journal of cell science*. 2016;129(3):477-82.  
790 doi: 10.1242/jcs.177527. PubMed PMID: WOS:000369505600004.
- 791 64. Kourtidis A, Ngok SP, Anastasiadis PZ. p120 catenin: an essential regulator of  
792 cadherin stability, adhesion-induced signaling, and cancer progression. *Prog Mol Biol*  
793 *Transl Sci*. 2013;116:409-32. Epub 2013/03/14. doi: 10.1016/B978-0-12-394311-  
794 8.00018-2. PubMed PMID: 23481205; PubMed Central PMCID: PMC4960658.
- 795 65. Moon RT, Kohn AD, De Ferrari GV, Kaykas A. WNT and beta-catenin signalling:  
796 diseases and therapies. *Nature reviews Genetics*. 2004;5(9):691-701. doi:  
797 10.1038/nrg1427. PubMed PMID: 15372092.
- 798 66. Bays JL, DeMali KA. Vinculin in cell-cell and cell-matrix adhesions. *Cellular and*  
799 *molecular life sciences : CMLS*. 2017;74(16):2999-3009. Epub 2017/04/13. doi:  
800 10.1007/s00018-017-2511-3. PubMed PMID: 28401269; PubMed Central PMCID:  
801 PMC4960658.
- 802 67. Cai D, Dai W, Prasad M, Luo J, Gov NS, Montell DJ. Modeling and analysis of  
803 collective cell migration in an in vivo three-dimensional environment. *Proceedings of the*  
804 *National Academy of Sciences of the United States of America*. 2016;113(15):E2134-  
805 41. doi: 10.1073/pnas.1522656113. PubMed PMID: 27035964; PubMed Central  
806 PMCID: PMC4839456.
- 807 68. Friedl P, Gilmour D. Collective cell migration in morphogenesis, regeneration and  
808 cancer. *Nature reviews Molecular cell biology*. 2009;10(7):445-57. doi:  
809 10.1038/nrm2720. PubMed PMID: 19546857.

- 810 69. Stuelten CH, Parent CA, Montell DJ. Cell motility in cancer invasion and  
811 metastasis: insights from simple model organisms. *Nature reviews Cancer*.  
812 2018;18(5):296-312. doi: 10.1038/nrc.2018.15. PubMed PMID: 29546880.
- 813 70. Geisbrecht ER, Sawant K, Su Y, Liu ZC, Silver DL, Burtscher A, et al. Genetic  
814 interaction screens identify a role for hedgehog signaling in *Drosophila* border cell  
815 migration. *Developmental dynamics : an official publication of the American Association*  
816 *of Anatomists*. 2013;242(5):414-31. doi: 10.1002/dvdy.23926. PubMed PMID:  
817 23335293; PubMed Central PMCID: PMC3721345.
- 818 71. McLaughlin SK, Olsen SN, Dake B, De Raedt T, Lim E, Bronson RT, et al. The  
819 RasGAP gene, RASAL2, is a tumor and metastasis suppressor. *Cancer cell*.  
820 2013;24(3):365-78. doi: 10.1016/j.ccr.2013.08.004. PubMed PMID: 24029233; PubMed  
821 Central PMCID: PMC3822334.
- 822 72. Sun L, Yao Y, Lu T, Shang Z, Zhan S, Shi W, et al. DAB2IP Downregulation  
823 Enhances the Proliferation and Metastasis of Human Gastric Cancer Cells by  
824 Derepressing the ERK1/2 Pathway. *Gastroenterology research and practice*.  
825 2018;2018:2968252. doi: 10.1155/2018/2968252. PubMed PMID: 29743885; PubMed  
826 Central PMCID: PMC5884246.
- 827 73. Liu L, Xu C, Hsieh JT, Gong J, Xie D. DAB2IP in cancer. *Oncotarget*.  
828 2016;7(4):3766-76. doi: 10.18632/oncotarget.6501. PubMed PMID: 26658103; PubMed  
829 Central PMCID: PMC4826168.
- 830 74. Dote H, Toyooka S, Tsukuda K, Yano M, Ouchida M, Doihara H, et al. Aberrant  
831 promoter methylation in human DAB2 interactive protein (hDAB2IP) gene in breast  
832 cancer. *Clinical cancer research : an official journal of the American Association for*  
833 *Cancer Research*. 2004;10(6):2082-9. PubMed PMID: 15041729.
- 834 75. Huang Y, Zhao M, Xu H, Wang K, Fu Z, Jiang Y, et al. RASAL2 down-regulation  
835 in ovarian cancer promotes epithelial-mesenchymal transition and metastasis.  
836 *Oncotarget*. 2014;5(16):6734-45. doi: 10.18632/oncotarget.2244. PubMed PMID:  
837 25216515; PubMed Central PMCID: PMC4196159.
- 838 76. Hui K, Wu S, Yue Y, Gu Y, Guan B, Wang X, et al. RASAL2 inhibits tumor  
839 angiogenesis via p-AKT/ETS1 signaling in bladder cancer. *Cellular signalling*.  
840 2018;48:38-44. doi: 10.1016/j.cellsig.2018.04.006. PubMed PMID: 29702203.
- 841 77. Noto S, Maeda T, Hattori S, Inazawa J, Imamura M, Asaka M, et al. A novel  
842 human RasGAP-like gene that maps within the prostate cancer susceptibility locus at  
843 chromosome 1q25. *FEBS letters*. 1998;441(1):127-31. PubMed PMID: 9877179.
- 844 78. Maertens O, Cichowski K. An expanding role for RAS GTPase activating proteins  
845 (RAS GAPs) in cancer. *Advances in biological regulation*. 2014;55:1-14. doi:  
846 10.1016/j.jbior.2014.04.002. PubMed PMID: 24814062.

- 847 79. Li Y, Merkel CD, Yang X, Heier JA, Cantrell PS, Sun M, et al. The N-cadherin  
848 interactome in primary cardiomyocytes as defined by quantitative proximity proteomics.  
849 2018. doi: 10.1101/348953 %J bioRxiv.
- 850 80. Bianco A, Poukkula M, Cliffe A, Mathieu J, Luque CM, Fulga TA, et al. Two  
851 distinct modes of guidance signalling during collective migration of border cells. *Nature*.  
852 2007;448(7151):362-5. doi: 10.1038/nature05965. PubMed PMID: 17637670.
- 853 81. McDonald JA, Pinheiro EM, Kadlec L, Schupbach T, Montell DJ. Multiple EGFR  
854 ligands participate in guiding migrating border cells. *Developmental biology*.  
855 2006;296(1):94-103. doi: 10.1016/j.ydbio.2006.04.438. PubMed PMID: 16712835.
- 856 82. Duchek P, Somogyi K, Jekely G, Beccari S, Rorth P. Guidance of cell migration  
857 by the *Drosophila* PDGF/VEGF receptor. *Cell*. 2001;107(1):17-26. PubMed PMID:  
858 11595182.
- 859 83. Goentoro LA, Reeves GT, Kowal CP, Martinelli L, Schupbach T, Shvartsman SY.  
860 Quantifying the Gurken morphogen gradient in *Drosophila* oogenesis. *Dev Cell*.  
861 2006;11(2):263-72. doi: 10.1016/j.devcel.2006.07.004. PubMed PMID: 16890165;  
862 PubMed Central PMCID: PMC4091837.
- 863 84. Shilo BZ. Signaling by the *Drosophila* epidermal growth factor receptor pathway  
864 during development. *Experimental cell research*. 2003;284(1):140-9. PubMed PMID:  
865 12648473.
- 866 85. Wang X, He L, Wu YI, Hahn KM, Montell DJ. Light-mediated activation reveals a  
867 key role for Rac in collective guidance of cell movement in vivo. *Nature cell biology*.  
868 2010;12(6):591-7. doi: 10.1038/ncb2061. PubMed PMID: 20473296; PubMed Central  
869 PMCID: PMC2929827.
- 870 86. Ridley AJ. Rho GTPase signalling in cell migration. *Curr Opin Cell Biol*.  
871 2015;36:103-12. doi: 10.1016/j.ceb.2015.08.005. PubMed PMID: 26363959; PubMed  
872 Central PMCID: PMC4728192.
- 873 87. Emms DM, Kelly S. OrthoFinder: solving fundamental biases in whole genome  
874 comparisons dramatically improves orthogroup inference accuracy. *Genome biology*.  
875 2015;16:157. doi: 10.1186/s13059-015-0721-2. PubMed PMID: 26243257; PubMed  
876 Central PMCID: PMC4531804.
- 877 88. Loytynoja A, Goldman N. Phylogeny-aware gap placement prevents errors in  
878 sequence alignment and evolutionary analysis. *Science*. 2008;320(5883):1632-5. doi:  
879 10.1126/science.1158395. PubMed PMID: 18566285.
- 880 89. Yang ZH. PAML 4: Phylogenetic analysis by maximum likelihood. *Mol Biol Evol*.  
881 2007;24(8):1586-91. doi: 10.1093/molbev/msm088. PubMed PMID:  
882 WOS:000248848400003.

- 883 90. Stamatakis A. RAxML version 8: a tool for phylogenetic analysis and post-  
884 analysis of large phylogenies. *Bioinformatics*. 2014;30(9):1312-3. doi:  
885 10.1093/bioinformatics/btu033. PubMed PMID: WOS:000336095100024.
- 886 91. Revell LJ. phytools: an R package for phylogenetic comparative biology (and  
887 other things). *Methods Ecol Evol*. 2012;3(2):217-23. doi: 10.1111/j.2041-  
888 210X.2011.00169.x. PubMed PMID: WOS:000302538500001.
- 889 92. Wang H, Qiu Z, Xu Z, Chen SJ, Luo J, Wang X, et al. aPKC is a key polarity  
890 determinant in coordinating the function of three distinct cell polarities during collective  
891 migration. *Development*. 2018;145(9). doi: 10.1242/dev.158444. PubMed PMID:  
892 29636381.
- 893 93. Prasad M, Jang AC, Starz-Gaiano M, Melani M, Montell DJ. A protocol for  
894 culturing *Drosophila melanogaster* stage 9 egg chambers for live imaging. *Nature*  
895 *protocols*. 2007;2(10):2467-73. doi: 10.1038/nprot.2007.363. PubMed PMID: 17947988.
- 896
- 897

## 898 **Figure Legends**

### 899 **Fig 1. Gene ontology enrichment analysis for genes identified in *shg* ERC**

900 **analysis.** A. ERC analysis reveals an evolutionary relationship between *shg*,  *$\alpha$ -cat* and  
901 *p120ctn*. B. Genes from the *shg* list with ERC values  $\geq 0.4$  are enriched for genes that  
902 encode plasma membrane and cell periphery proteins. C. *shg* ERC list is enriched for  
903 genes with established roles in regulating biological processes that require cadherin-  
904 mediated adhesion. D. Human orthologs of the *shg* ERC list are involved in remodeling  
905 of epithelial AJs and multiple canonical pathways including RhoA, TGF- $\beta$ , PTEN and AJ  
906 signaling.

907 **Fig 2. *shg* ERC genes regulate BC migration.** A. Cartoon representation of BC  
908 migration during egg chamber development. BC, border cell; PC, polar cell; NC, nurse  
909 cell; FE, follicular epithelium; A, anterior; P, posterior. B-G. Representative images of  
910 egg chambers expressing UAS-GFP and UAS-RNAi for control (luciferase) (B), *shg* (C),  
911 *Pdk1* (D), *babo* (E), *CG42684* (F) or *CG16952* (G) under the control of *slbo*-GAL4.  
912 White arrow indicates BC cluster position. Yellow triangles mark FE retraction border.  
913 Maximum projections of 20  $\mu$ m z-stacks are shown. Posterior is to the right in all  
914 images. H. Border cell migration scoring classes. I-K. Percentage of egg chambers in  
915 each class displaying migration defects in AJ-related genes (I), *shg* ERC target genes  
916 (J) and random negative control genes (K). Red 0-25%, yellow 25-75% and green 75-  
917 100%. N values are listed in S5 Table. Scale bar in G is 50  $\mu$ m and applies to B-G.

918 **Fig 3. *shg* ERC genes maintain BC adhesion during migration.** A-F. Egg chambers  
919 expressing UAS-GFP and UAS-RNAi for control (A),  *$\alpha$ -Cat* (B), *CG42684* (C), *PDZ-GEF*  
920 (D), *CG16952* (E) or *CG11593* (F). White arrows mark disassociated BCs. White

921 arrowheads mark BC cluster adjacent to oocyte. Yellow triangles mark the FE retraction  
922 border. Maximum projections of 20  $\mu\text{m}$  z-stacks are shown. G-I. Percentage of egg  
923 chambers displaying a cluster disassociation phenotype in AJ genes (G), *shg* ERC  
924 target genes (H) and random negative control genes (I). Scale bar in F is 50  $\mu\text{m}$  and  
925 applies to A-F.

926 **Fig 4. *shg* ERC genes regulate DE-Cadherin levels in BCs.** A-G. Representative  
927 images of BC clusters stained for nuclei (blue) and expressing DE-Cad-GFP and control  
928 (A.), *shg* (B), *CG42684* (C), *CG16952* (D), *CG11593* (E), *Pdk1* (F) or *babo* (G) RNAi  
929 under the control of *slbo*-GAL4. White arrows mark BC-BC contacts. PCs are outlined  
930 by a dashed line. Maximum projections of 5  $\mu\text{m}$  z-stacks are shown. H. Quantification of  
931 DE-Cad levels at BC-BC contacts in control (n=69), *shg* (n=66), *CG42684* (n=72),  
932 *CG16952* (n=69), *CG11593*(n=69), *Pdk1*(n=66) and *babo* (n=69) RNAi-expressing BCs.  
933 \*\*\*\* -  $p < 0.0001$ , \*\*\* -  $p < 0.001$ . Error bars represent mean  $\pm$  SD. Scale bar in G is 10  $\mu\text{m}$   
934 and applies to A-G.

935 **Fig 5. Raskol localizes to BC contacts.** A-B. Egg chambers expressing Raskol-YFP  
936 and stained for F-actin (red) at stage 8 (A) and stage 9 (B). C-D. Egg chamber  
937 expressing Raskol-YFP and stained with DE-Cad (red) at stage 8 (C) and stage 9 (D).  
938 Yellow triangles indicate the apical side of PCs. Purple triangles mark cell-cell contacts.  
939 White triangles mark Raskol localization in the leading protrusion. FE – follicular  
940 epithelium. Maximum projections of 5  $\mu\text{m}$  z-stacks are shown. Scale bar in D is 10  $\mu\text{m}$   
941 and applies to A-D.

942 **Fig 6. Raskol regulates actin organization in migrating BC clusters.** A-C.  
943 Representative images of egg chambers stained for F-actin (green) and nuclei (blue)

944 expressing control RNAi (A), *shg* RNAi (B) and *raskol* RNAi (C) in PCs using *upd*-GAL4.  
945 Asterisks mark the final position of the BC cluster adjacent to the oocyte. Arrows mark  
946 disassociated BC cells along the migratory path. Maximum projections of 10  $\mu$ m stacks  
947 z-stacks are shown. D. Quantification of the cluster disassociation phenotype in control,  
948 *shg* and *raskol* RNAi-expressing BCs ( $p < 0.0001$ ). E-F. BC cluster expressing control  
949 RNAi (E) and *raskol* RNAi (F) under the control of *slbo*-GAL4 and stained for F-actin  
950 (red) and nuclei (blue). A white arrow marks the actin patch at the leading protrusion.  
951 White arrowheads mark ectopic actin patches around the BC cluster. G. Quantification  
952 of ectopic actin patches in control ( $n=30$ ) and *raskol* ( $n=39$ ) RNAi BC clusters  
953 ( $p < 0.0001$ ). H-I. Time-lapse images of migrating cluster expressing lifeact-GFP and  
954 control RNAi (H,  $n=8$ ) or *raskol* RNAi (I,  $n=8$ ) in BCs. White arrows mark the leading  
955 protrusion. Red triangles mark ectopic protrusions. f - front, m - middle and r - rear. J.  
956 Radar maps showing the distribution of protrusions around the BC cluster.  $0^\circ$  is the  
957 direction of migration. K. Number of front-oriented protrusions per frame observed in  
958 control and *raskol* RNAi expressing clusters.  $p=0.71$ . L. Number of protrusions per  
959 frame at the middle and rear of control RNAi and *raskol* RNAi-expressing clusters  
960 ( $p=0.0002$ ). Scale bar in C is 10  $\mu$ m and applies to A-C. Scale bar in panel F is 10  $\mu$ m  
961 and applies to E-F. Scale bar in I is 10  $\mu$ m and applies to H-I. Error bars in all graphs  
962 represent SD.

963

964 **Movies**

965 **Movie 1. Border cell migration in control RNAi egg chambers.** Lifeact-GFP and  
966 RNAi transgenes expressed under control of *slbo*-GAL4. 30 mins.

967 **Movie 2. Border cell migration in *rasko* RNAi egg chambers.**

968 **Movie 3. Border cell delamination defects in *rasko* RNAi egg chambers.**

969 **Movie 4. Border cell cluster disassociation defects in *rasko* RNAi egg chambers.**

970



971 **Supplemental Figure Legends**

972 **S1 Fig. DE-Cad levels are not reduced in BCs expressing RNAi against target**

973 **genes with low ERC values.** A-D. Representative images of BC clusters expressing

974 DE-Cad-GFP and UAS-RNAi constructs in the BCs under the control of *s/bo*-GAL4.

975 Expression of UAS-RFP (A) and *CG5875* RNAi (D) did not result in significantly

976 difference in DE-Cad levels at the BC-BC contacts relative to control. B. Expression of

977 *Hrb98DE* RNAi (B) reduced DE-Cad levels at BC-BC contacts relative to control. C.

978 Expression of *capt* RNAi (C) increased levels of DE-Cad at BC contacts relative to

979 control. PC boundaries are marked by dashed lines. E. Quantification of DE-Cad levels

980 at the BC-BC contacts of UAS-RFP (n=75), *Hrb98DE* (n=72), *capt* (n=60) and *CG5875*

981 (n=60) RNAi expressing clusters. \*\*\* -  $p < 0.001$ , \*\* -  $p < 0.01$ . Error bars represent mean

982  $\pm$  SD. Scale bar in D is 10  $\mu$ m and applies to A-D.

983 **S2 Fig. Raskol colocalizes with DE-Cad in the FE.** A. Dorsal view of the FE in egg

984 chamber expressing Raskol-YFP and stained for DE-Cad (red) and F-actin (blue).

985 Raskol is enriched at the apical surface of the FE and colocalizes with DE-Cad and F-

986 actin. B. Cross-sectional images of the FE. Raskol colocalizes with DE-Cad and F-actin

987 at the apical membrane of FE cells (arrows). Raskol also colocalizes with DE-Cad at PC

988 contacts (arrowheads). In B, FE apical membrane faces the NCs. Individual channels

989 correspond to the outlined box in the merged image. Scale bar in B is 10  $\mu$ m and

990 applies to A and B.

991 **S3 Fig. Raskol colocalizes with DE-Cad in the amnioserosa and ectodermal cells**

992 **during DC.** A-D. Time-lapse images of Raskol-YFP and DE-Cad-RFP embryos during

993 DC. Raskol colocalizes with DE-Cad at cell contacts in the amnioserosa (arrows).

994 Raskol colocalizes with DE-Cad at the zippering interface of dorsal most ectodermal  
995 cells (arrowheads). Individual channels correspond to the outlined box in the merged  
996 image. Scale bar in D is 10  $\mu$ m and applies to all panels.

997 **S4 Fig. Coexpression pattern of *shg* and *raskol*.** A. Mean cytoplasmic levels of  
998 Raskol in PCs and BCs relative to NCs. Cytoplasmic levels of Raskol are significantly  
999 higher in PCs compared to BCs according to Welch's t-test (n=58, p<0.0001). B. *shg*  
1000 and *raskol* expression patterns display similar trends during embryonic development.  
1001 RNA-seq based expression data (obtained from [www.flybase.org](http://www.flybase.org)) in *Drosophila*  
1002 embryos were plotted for *shg* and *raskol* during embryonic stages (2 hr increments).  
1003 Expression of both *shg* and *raskol* peaks at 6-8 hr after egg laying.

1004

1005 **S1 Table. Top 500 *shg* ERC hits**

1006 **S2 Table. Enrichment analysis of *shg* ERC human orthologs: canonical pathways**

1007 **S3 Table. Enrichment analysis of *shg* ERC human orthologs: disease**

1008 **S4 Table. RNAi stocks used in this study**

1009 **S5 Table. Border cell migration and cluster disassociation data**

**Figure 1**

**A**

|                   | armadillo | $\alpha$ -Catenin | shotgun |
|-------------------|-----------|-------------------|---------|
| $\alpha$ -Catenin | -0.31     |                   |         |
| shotgun           | -0.31     | 0.47              |         |
| p120ctn           | -0.26     | 0.60              | 0.26    |

**B**

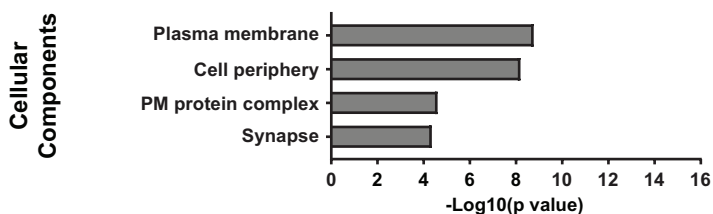

**C**

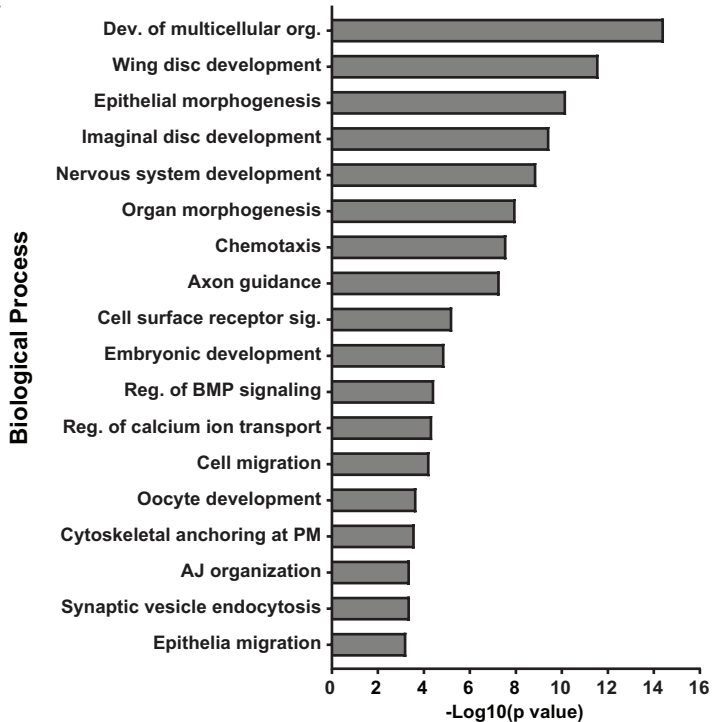

**D**

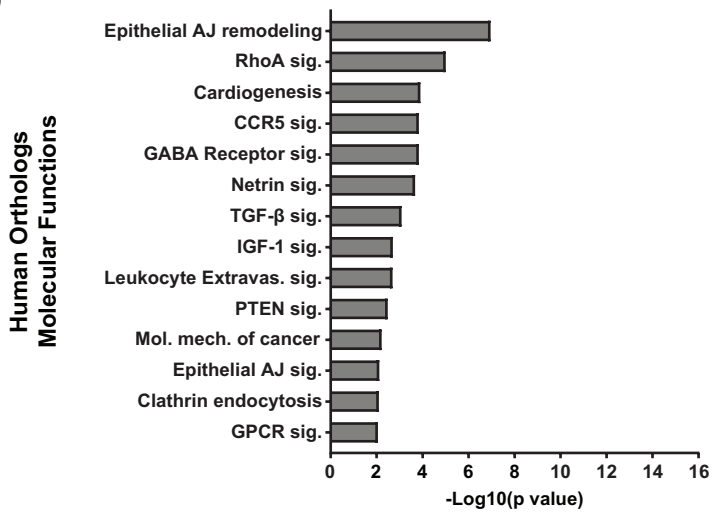

## Figure 2

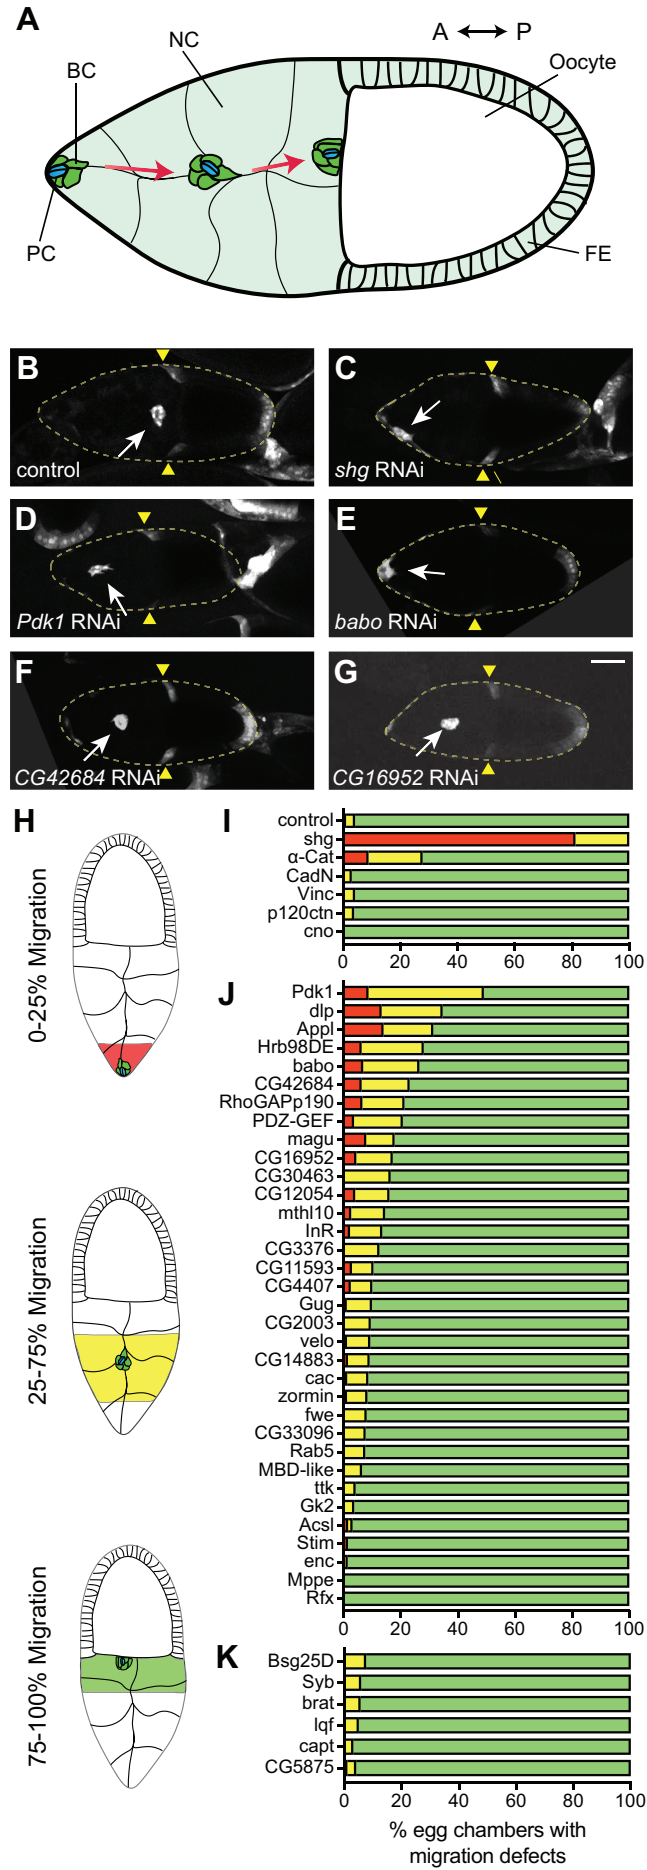

### Figure 3

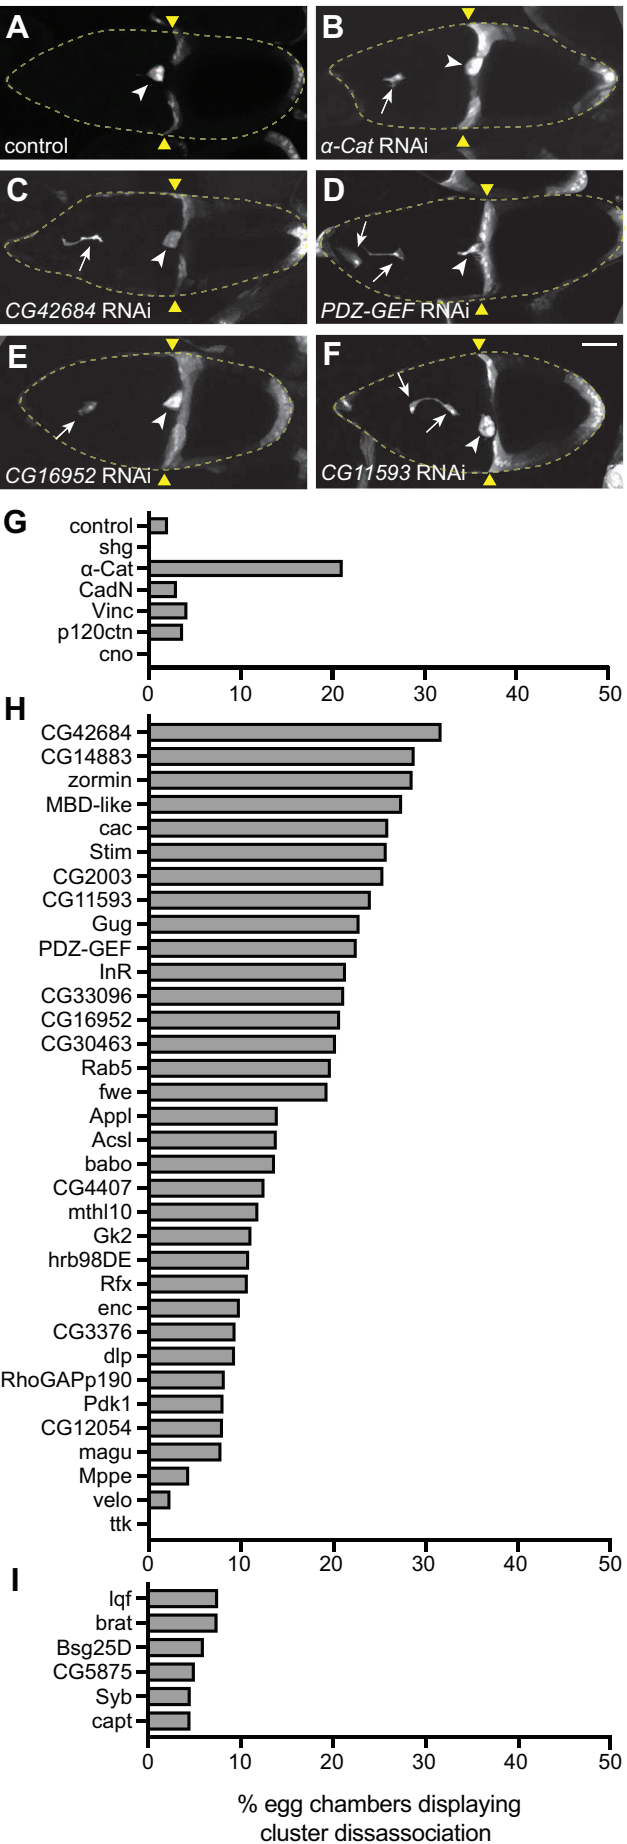

Figure 4

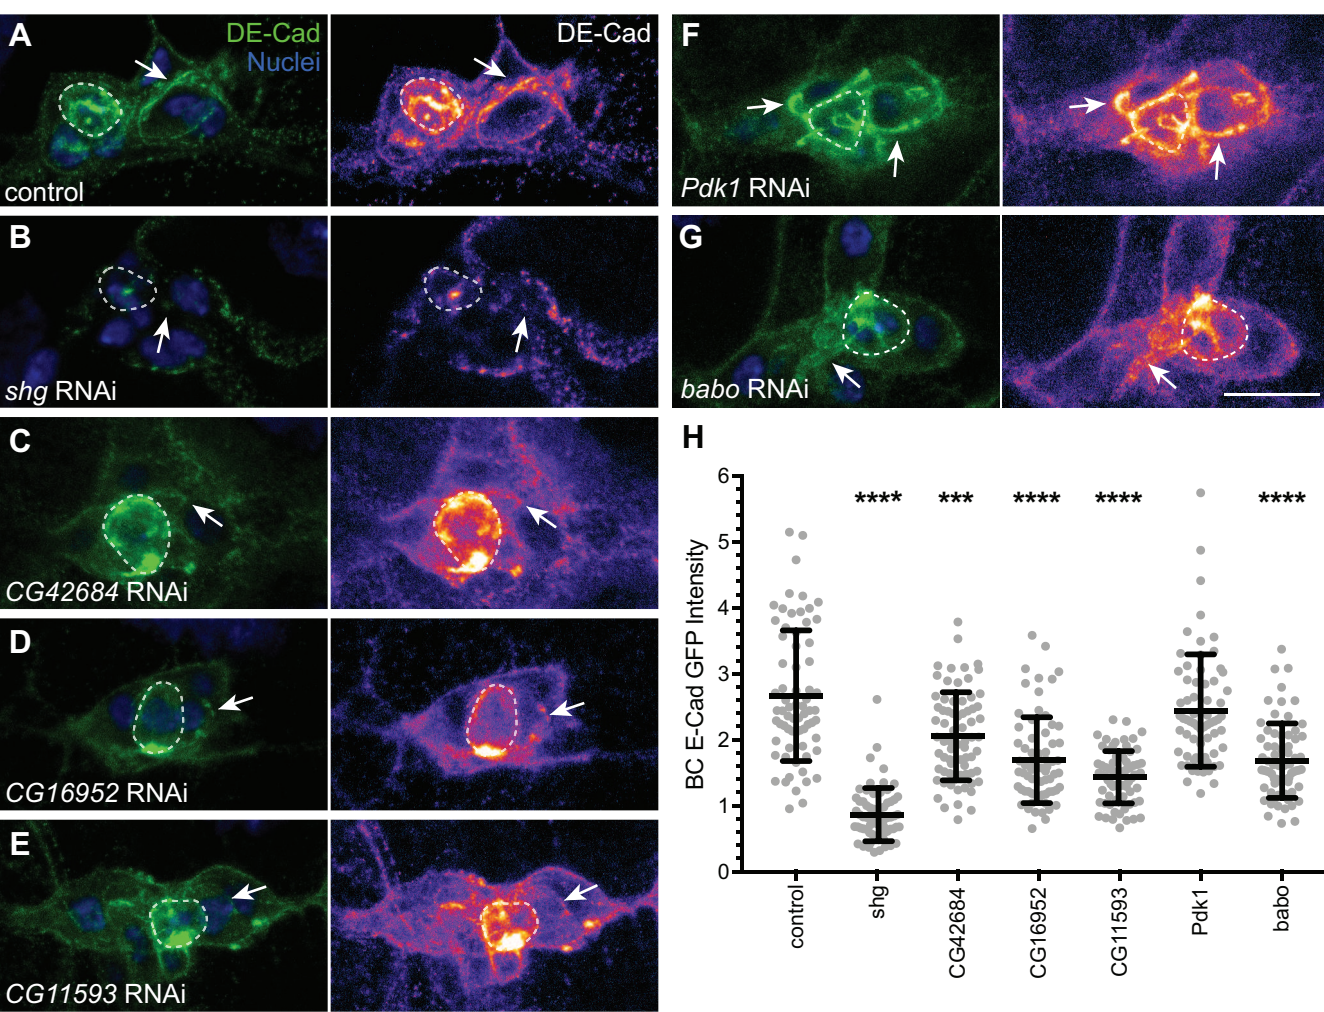

**Figure 5**

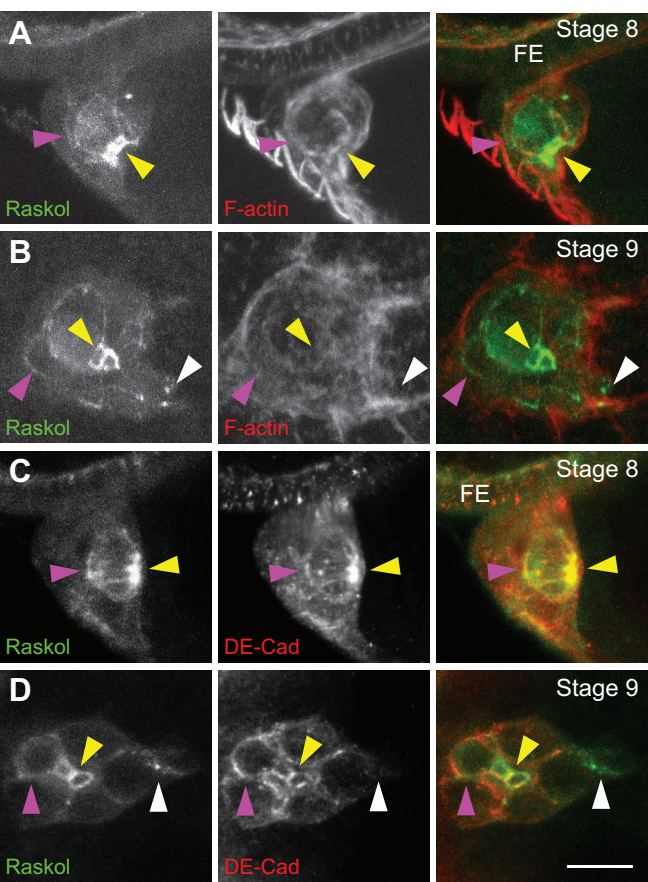

Source: https://www.biorxiv.org/content/10.1101/429472v1.full.pdf
